1 ***Prochlorococcus* rely on microbial interactions rather than on chlorotic resting stages to**  
2 **survive long-term stress**

3

4 Dalit Roth-Rosenberg<sup>1</sup>#, Dikla Aharonovich<sup>1</sup>#, Tal Luzzatto-Knaan<sup>1</sup>#, Angela Vogts<sup>2</sup>, Luca Zoccarato<sup>3</sup>, Falk  
5 Eigemann<sup>2</sup>, Noam Nago<sup>1</sup>, Hans-Peter Grossart<sup>3,4</sup>, Maren Voss<sup>2</sup> and Daniel Sher <sup>\*1</sup>

6 <sup>1</sup> Department of Marine Biology, Leon H. Charney School of Marine Sciences, University of Haifa, 31905,  
7 Israel; <sup>2</sup> Leibniz-Institute for Baltic Sea Research, Seestrasse15, D-18119 Warnemuende, Germany; <sup>3</sup>

8 Department of Experimental Limnology, Leibniz-Institute of Freshwater Ecology and Inland Fisheries,  
9 Alte Fischerhuetten 2, D-16775 Stechlin, Germany; <sup>4</sup>Potsdam University, Institute of Biochemistry and  
10 Biology, Maulbeerallee 2, D-14469 Potsdam, Germany

11

12 \* Corresponding author: [dsher@univ.haifa.ac.il](mailto:dsher@univ.haifa.ac.il)

13 # These authors contributed equally to this study

14

15 **Abstract**

16 Many microorganisms produce resting cells with very low metabolic activity that allows them to survive  
17 phases of prolonged stress conditions. Using axenic lab cultures, we show that *Prochlorococcus*, the  
18 dominant phytoplankton lineage in large regions of the nutrient-poor ocean, cannot survive extended  
19 nutrient starvation alone. Under starvation conditions some cells retain metabolic activity, measured as  
20 single-cell C and N uptake, but these cultures do not re-grow when transferred into new media.  
21 Nevertheless, co-cultures with a heterotrophic bacterium enabled *Prochlorococcus* to survive nutrient  
22 starvation for months. We extend these observations to natural conditions, suggesting that up to 10% of  
23 the *Prochlorococcus* cells in the oceans live under conditions of light starvation, utilizing organic matter  
24 produced by other organisms. We propose that reliance on co-occurring heterotrophic bacteria or on  
25 the organic matter they produce, rather than the ability to survive extended starvation as resting cells,  
26 underlies the ecological success of *Prochlorococcus*.

27

28 **Introduction**

29 Not all microbial cells living in natural environments are equally active. In aquatic environments, up to  
30 90% of the cells do not exhibit measurable metabolic activity (“vitality”), based on dyes (e.g. that assess  
31 electron transport) or on uptake assays with labeled substrates (Del Giorgio and Gasol 2008). Several

32 possible and non-exclusive explanations have been proposed for this heterogeneity. First, inherent  
33 differences in activity between genetically-different organisms, e.g. due to variations in maximum  
34 growth rate or the ability to utilize the specific substrate tested. Second, cells might be at different  
35 physiological states, e.g. exponentially growing, starved or dying, and thus less active  
36 metabolically (Anderson et al. 2015, Jørgensen et al. 2015, Bergkessel et al. 2016). Third, cells show  
37 stochastic fluctuations in their activity, due to noise in gene expression or regulatory networks (Engl  
38 2018). Finally, some organisms respond to environmental stress by producing resting stages or spores.  
39 Such cells often exhibit very low (or undetectable) metabolic activity, yet are viable, namely able to  
40 return to an active state and reproduce when environmental conditions return to favorable (Harms et al.  
41 2016). The presence of such resting stages, together with a fluctuating activity at the single-cell level and  
42 the genetic variability found within natural populations, are suggested to promote the survival of the  
43 population as a whole (Lennon and Jones 2011, Bergkessel et al. 2016) .

44         Understanding the factors affecting the metabolic activity (vitality) of phytoplankton is of special  
45 interest. These microbial primary producers perform about one-half of the photosynthesis on Earth,  
46 providing energy through carbon fixation at the base of the aquatic ecosystem. At the same time, low  
47 nutrient concentrations due to uptake by phytoplankton may constrain the growth of co-occurring  
48 organisms. Phytoplankton viability, e.g. their ability to survive under conditions of nutrient stress, has  
49 also been extensively studied, especially for organisms that produce massive blooms that emerge and  
50 decline rapidly. For example, some bloom-forming cyanobacteria such as *Aphanizomenon* species  
51 produce morphologically-distinct spores that show very little photosynthetic activity, yet remain viable  
52 in the sediment for long periods of time, providing the inoculum for the next growth season (Sukenik et  
53 al. 2015). In laboratory cultures of *Synechococcus elegantus* PCC7942 and *Synechocystis* PCC6803, two  
54 unicellular freshwater cyanobacteria, nitrogen starvation results in a programmed process where cells  
55 enter a resting stage, enabling them to survive prolonged periods of stress (Sauer et al. 2001, Klotz et al.  
56 2016). As part of this process, cells degrade their photosynthetic apparatus in a controlled manner,  
57 resulting in a loss of chlorophyll autofluorescence and culture bleaching (a process termed chlorosis).  
58 However, the observation that chlorotic cells are viable resting stages is not universal. Chlorotic cultures  
59 of *Microcystis aeruginosa* PCC 7806 were shown to contain a small population of non-chlorotic cells with  
60 high chlorophyll autofluorescence (described throughout this study as “high-fl”). Only these high-fl cells  
61 were suggested to revive after the re-addition of a nitrogen source, while the low-fl cells are presumably  
62 dead (de Abreu Meireles et al. 2015). Chlorotic cells were also observed in eukaryotic phytoplankton

63 albeit it is not yet clear to what extent such cells remain viable as it may depend on the specific  
64 organism and stress conditions (Behrenfeld and Falkowski 1997, Franklin et al. 2006).

65 *Prochlorococcus* is a pico-cyanobacterium that is extremely abundant in the oligotrophic  
66 oceans, performing an estimated ~8.5% of global ocean photosynthesis (Flombaum et al. 2013), and  
67 providing fixed carbon for up to 75% of the co-occurring heterotrophic community (Ribalet et al. 2015).  
68 *Prochlorococcus* cells in the oceans exhibit extremely high genetic diversity (Kashtan et al. 2014), and  
69 some of this diversity has been linked with their ability to grow under conditions of extreme nutrient  
70 limitation (e.g. Martiny et al. 2006, Thompson et al. 2011). It has therefore been suggested that this  
71 genetic diversity enables *Prochlorococcus* as a group to thrive across a wide variety of oceanic conditions  
72 (Biller et al. 2014). While the physiological and transcriptional responses of multiple *Prochlorococcus*  
73 lineages to short-term nutrient starvation have been extensively studied (e.g. Steglich et al. 2001, Martiny  
74 et al. 2006, Tolonen et al. 2006, Thompson et al. 2011, Krumhardt et al. 2013), little is known about their  
75 ability to survive more than a few days under such conditions. A recent study on the response of  
76 *Prochlorococcus* strains to extended darkness (i.e. C starvation) has shown that these organisms can  
77 survive light starvation only for a limited time (Coe et al. 2016). In these experiments, low-fl cell  
78 populations reminiscent of chlorotic cells in other cyanobacteria appear after the light-starved cultures  
79 were re-exposed to light, regardless of whether these cultures could continue growing (Coe et al. 2016).  
80 We therefore asked: i) Do *Prochlorococcus* respond to long-term nutrient starvation by producing  
81 chlorotic cells? ii) If so, are such cells metabolically active (vital) and are they able to reproduce and  
82 grow when stress conditions end (viable)? iii) Can chlorotic *Prochlorococcus* cells be observed in nature?  
83 To address these questions, we used fluorescence-activated cell sorting (FACS) to obtain distinct  
84 chlorotic sub-populations from axenic and unialgal laboratory cultures of *Prochlorococcus* which were  
85 pre-incubated with isotopically-labelled tracers for photosynthesis ( $\text{H}^{13}\text{CO}_3$ ) and nutrient uptake ( $^{15}\text{NH}_4^+$ )  
86 and we visualized their activity using Nanoscale Secondary Ion Mass Spectrometry (NanoSIMS). This  
87 method enabled us to measure photosynthesis and N uptake at a single cell resolution by quantifying  
88 the change in isotopic ratios (Gao et al. 2016, Berthelot et al. 2018). Our results show that while  
89 *Prochlorococcus* do undergo a chlorosis-like process, with some of the chlorotic cells still  
90 photosynthesizing and taking up  $\text{NH}_4^+$ , the chlorotic cells are unable to re-grow and thus do not  
91 represent resting stages. Instead, co-culture with heterotrophic bacteria in the lab and mixotrophy in  
92 the ocean, two aspects of microbial interactions, enable *Prochlorococcus* to survive long-term stress  
93 even without producing resting stages.

94

95 **Results and discussion**

96 **Emergence of chlorotic sub-populations in *Prochlorococcus* cultures**

97 As *Prochlorococcus* batch cultures reach stationary stage and start declining, the green color of the  
98 cultures disappears, and sub-populations of cells emerge with lower chlorophyll autofluorescence that  
99 can be identified by flow cytometry (Figure 1A, B). This phenomenon is observed in strains from all  
100 major cultured ecotypes, as well as in *Synechococcus* WH8102 (Figure 1C). In *Prochlorococcus* strain  
101 MIT9312, lower chlorophyll populations emerged in batch cultures that reached stationary stage due to  
102 both N and P limitation, although the timing of sub-population emergence and the forward light scatter  
103 and chlorophyll autofluorescence (analyzed by flow cytometry) were different (Supplementary Fig. 1A,  
104 B). Cells with lower chlorophyll autofluorescence also appeared in populations of another strain,  
105 MIT9313, when these cultures were inhibited in a co-culture with high cell densities of the heterotrophic  
106 bacterium *Alteromonas* HOT1A3 (Supplementary Fig. 1C, D (Aharonovich and Sher 2016)). Thus, the  
107 emergence of populations of cells with lower chlorophyll autofluorescence under a variety of stress  
108 conditions is a pervasive phenomenon across marine pico-cyanobacteria. We therefore focused on  
109 *Prochlorococcus* strain MIT9313, which has been extensively studied (e.g. (Rocap et al. 2003, Martiny et  
110 al. 2006, Tolonen et al. 2006, Thompson et al. 2011, Voigt et al. 2014)), as in this strain three clearly  
111 separate sub-populations can be observed (Figure 1B, referred to throughout the study as high-, mid-  
112 and low-fl populations).

113 In addition to differing in their chlorophyll autofluorescence, the high-, mid- and low-fl cell  
114 populations also differ by their forward and side light scatter properties, which are related to cell size  
115 and (in larger cells) morphological complexity (Supplementary Fig 2A, B). In agreement with these  
116 observations, cells sorted from the high-fl population and observed by SEM (Scanning Electron  
117 Microscopy) were larger than those from the mid- and low-fl populations (Sup Fig 2C, D).

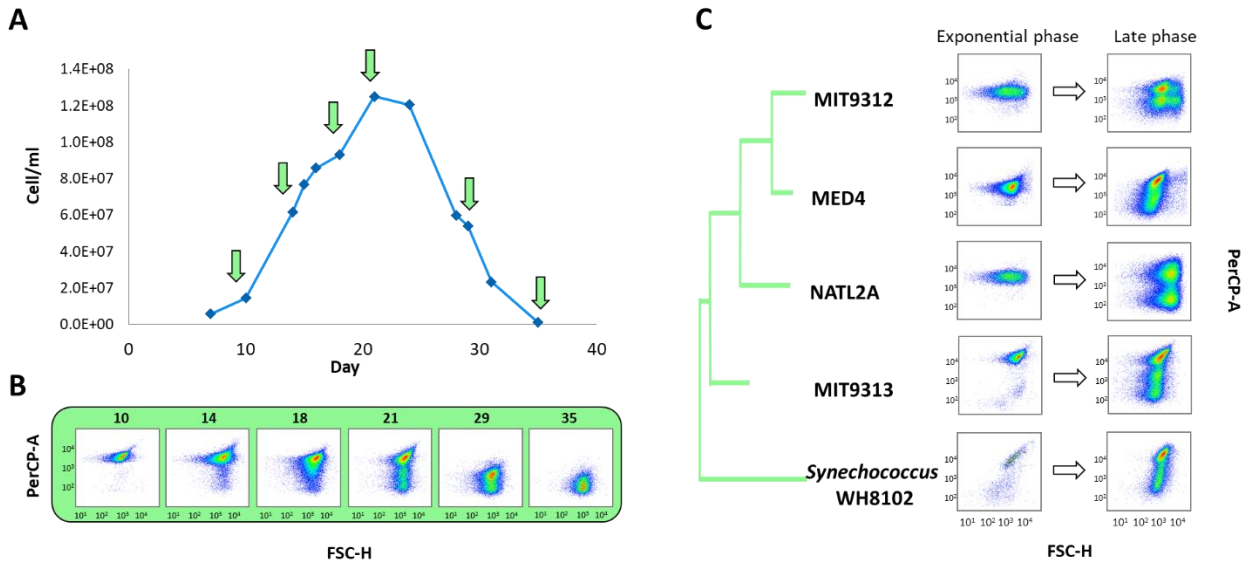

118 **Figure 1. Emergence of chlorotic sub-populations in *Prochlorococcus* batch cultures as measured by**  
 119 **flow cytometry.** A) A representative growth curve of MIT9313. The arrows mark the days shown in  
 120 panel B. B) Flow cytometry scattergrams at the marked time-points from the MIT9313 culture. The x-axis  
 121 is Forward Scatter (FSC, a proxy for cell size), the y-axis is the chlorophyll autofluorescence of the cells  
 122 (Per-CP). The emergence of chlorotic sub-population observed from the late exponential phase (Day 18).  
 123 C) Chlorotic sub-population observed in ageing batch cultures of *Prochlorococcus*, belonging to different  
 124 ecotypes: High-Light adapted MED4 (HLI), MIT9312 (HLII) and Low-Light adapted NATL2A (LLI) and  
 125 MIT9313 (LLIV). In all strains, the chlorotic cells begin to emerge at late exponential stage, becoming  
 126 dominant in declining cultures, while in the exponential phase only one population can be observed.

### 127 **Assessing the metabolic activity of sorted chlorotic sub-populations**

128 We next asked whether the high, mid- and low-fl populations differ in their vitality, measured here as  
 129 their photosynthesis and nutrient uptake rates (incorporation of  $\text{H}^{13}\text{CO}_3^-$  and  $^{15}\text{NH}_4^+$ , respectively). The  
 130 uptake ratio of labeled versus unlabeled nutrients were then used to calculate the metabolic activity of  
 131 the sorted cells (Table 1). As shown in Figure 2 and Table 1, the mean uptake of both  $\text{H}^{13}\text{CO}_3^-$  and  $^{15}\text{NH}_4^+$   
 132 was highest in the high-fl population, followed by the mid and low-fl populations, with the latter  
 133 population indistinguishable from the control, i.e. glutaraldehyde-killed cells. We have repeated the  
 134 entire workflow in an independent experiment, and the results are in striking correspondence  
 135 (Supplementary Fig. 3, Table 1).

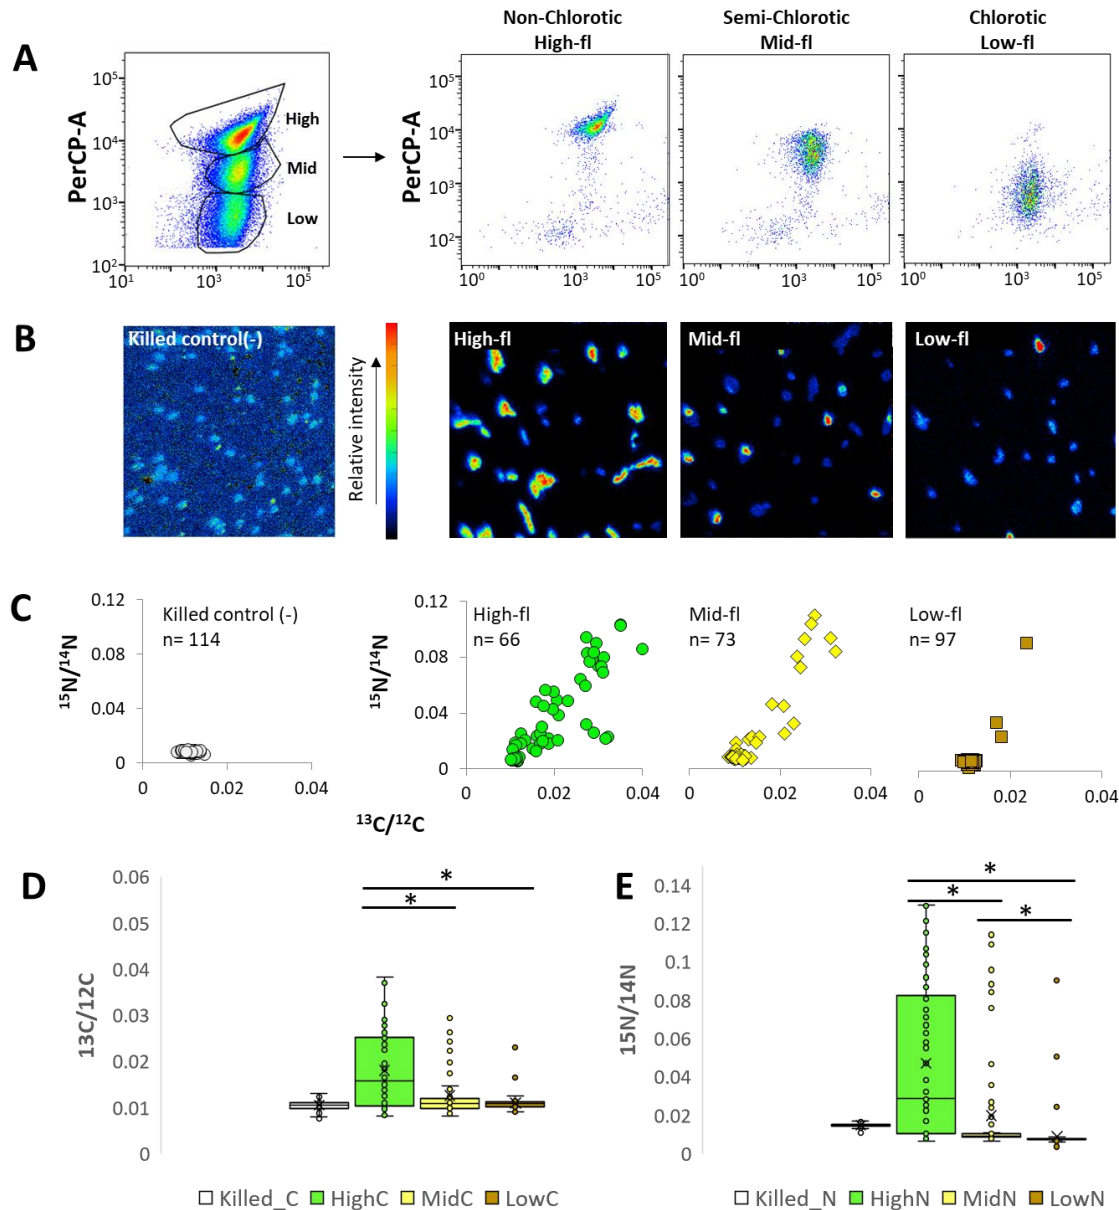

136 **Figure 2. Metabolic activity of sorted sub-populations by NanoSIMS** A) Flow cytometry scatterplots  
 137 before and after sorting of three distinct sub-populations (high, mid and low-fl) of an aging  
 138 *Prochlorococcus* MIT9313 culture, detected by flow cytometry. The cultures were grown for 30 days in  
 139 Pro99 and labeled with  $\text{H}^{13}\text{CO}_3^-$  and  $^{15}\text{NH}_4^+$  for 18h. B) NanoSIMS images of  $^{15}\text{N}/^{12}\text{C}$  analysis of killed cells  
 140 (negative control) and high, mid and low-fl cells after sorting. C) Scatterplot of  $^{13}\text{C}/^{12}\text{C}$  and  $^{15}\text{N}/^{14}\text{N}$  ratios  
 141 obtained from NanoSIMS analysis of each sub-population. D, E) Boxplots of the  $^{13}\text{C}/^{12}\text{C}$  and  $^{15}\text{N}/^{14}\text{N}$   
 142 enrichment in each sub-population. Lines represent the median, X represents the mean, box borders are  
 143 1<sup>st</sup> quartiles and whiskers represent the full range.

| Strain and growth stage             | Sub-population | Illumination                 | $V^C$ (fg cell <sup>-1</sup> day <sup>-1</sup> ) | $V^N$ (fg cell <sup>-1</sup> day <sup>-1</sup> ) |
|-------------------------------------|----------------|------------------------------|--------------------------------------------------|--------------------------------------------------|
| <b>Batch culture</b>                |                |                              |                                                  |                                                  |
| <b>MIT9313, exponential growth*</b> | High           | Constant light<br>27 $\mu$ E | 12.92 $\pm$ 11.93                                | 2.74 $\pm$ 2.43                                  |
|                                     | High           |                              | 2.67-<br>2.77 $\pm$ 2.89-<br>3.57                | 0.62-<br>0.69 $\pm$ 0.54-<br>0.63                |
| <b>MIT9313, old cultures **</b>     | Mid            | Constant light<br>27 $\mu$ E | 0.75-<br>0.79 $\pm$ 1.73-<br>1.78                | 0.25-<br>0.32 $\pm$ 0.42-<br>0.35                |
|                                     | Low            |                              | 0.09-<br>0.14 $\pm$ 0.52-<br>0.67                | 0.08-<br>0.14 $\pm$ 0.15-<br>0.12                |
|                                     | High           | Photo-period                 | 1.01 $\pm$ 2.67                                  | 0.32 $\pm$ 0.33                                  |
| <b>MIT9313, old culture***</b>      | Mid            | 12:12 L/D,<br>27 $\mu$ E     | 0.48 $\pm$ 2.47                                  | 0.20 $\pm$ 0.20                                  |
|                                     | Low            |                              | 0.13 $\pm$ 0.31                                  | 0.14 $\pm$ 0.11                                  |
|                                     |                |                              |                                                  |                                                  |
| <b>Natural samples</b>              |                |                              |                                                  |                                                  |
| <b>115m</b>                         | High           | Natural cycle                | 1.04 $\pm$ 0.6                                   | 1.17 $\pm$ 0.20                                  |
| <b>115m</b>                         | Low            | approximately<br>14:10 L/D,  | 1.14 $\pm$ 0.69                                  | 1.15 $\pm$ 0.38                                  |
| <b>125m</b>                         | High           | 2-5 $\mu$ E                  | 1.21 $\pm$ 0.89                                  | 1.28 $\pm$ 0.21                                  |

144 **Table 1: Calculated mean C and N uptake rates from the experiments performed with *Prochlorococcus***  
145 **MIT9313 and natural samples.** The means and standard deviation were calculated from the uptake rates values  
146 of single cells in each experiment.

147 \*The results for MIT9313 exponential growth refers to the experiment presented in Supplementary Fig. 5.

148 \*\*The results for old MIT9313 cultures under constant light refer to the two experiments presented in Fig. 2 and  
149 Supplementary Fig. 3.

150 \*\*\* The results for Old MIT9313 cultures under L/D refer to the experiment presented in Supplementary Fig. 4.

151 The mean uptake rates for glutaraldehyde killed cells (control) were 0.06 $\pm$ 0.15 for C and 0.18 $\pm$ 0.02 for N, and most  
152 likely depict the absorption of the label by non-specific binding or diffusion. Unlabeled-unsorted cells showed C  
153 values of 0.18 $\pm$ 0.39.57 and N values of 0.41 $\pm$ 0.14, the higher C and N values were probably due to non-sorted  
154 conditions and the higher density of the cells.

155

156 Within each of the populations, cell-cell heterogeneity was observed in both <sup>13</sup>C and <sup>15</sup>N uptake  
157 (Fig. 2, Supplementary Fig. 3). Within all of the populations (including the high-fl, “healthy” one), some  
158 cells were inactive, and this could not be explained by the limited purity of the FACS-sorting procedure

159 (Supplementary Tables 1,2). The coefficients of variation in C and N uptake rates were within the range  
160 shown for other organisms, or higher (Supplementary Table 3, (Matantseva et al. 2016, Berthelot et al.  
161 2018)). Similar levels of heterogeneity (primarily in N uptake) were also seen in cells grown under a  
162 12:12 light-dark cycle, where the *Prochlorococcus* cell-cycle follows a diel rhythm, suggesting that this  
163 heterogeneity is not due to different stages of the cell cycle or the diel cycle (Supplementary Table 3,  
164 Supplementary Fig. 4). Cell-cell heterogeneity was also observed in cells from an exponentially-growing,  
165 nutrient-replete culture (Supplementary Figure 5, Table 3), suggesting that this heterogeneity is not  
166 exclusively limited to ageing or stressed cells. This is in accordance with studies assessing the vitality of  
167 *Prochlorococcus* cells using various dyes, which consistently show that a significant fraction of the cells  
168 in laboratory cultures are inactive or potentially dead (Agusti and Sanchez 2002, Hughes et al. 2011).

### 169 **Evaluating the viability of sub-populations**

170 To determine whether the low-fl *Prochlorococcus* cells are viable resting stages, we tested the ability of  
171 cells from an MIT9313 culture to grow upon transfer to new growth media at different times during  
172 exponential growth and upon culture decline. As shown in Figure 3 and Supplementary Fig. 6, only cells  
173 from cultures where the high-fl cells were dominant could grow when transferred to new growth media.  
174 No growth was observed upon transfer of cells from stationary or declining cultures where no high-fl  
175 cells were observed. Intriguingly, the presence of high-fl cells was not enough to ensure culture growth  
176 (e.g. day 34 in Figure 3). This is consistent with a previous study showing that cells belonging to a  
177 different *Prochlorococcus* strain, MED4, that were incubated for three days in the dark, were unable to  
178 resume growth after return to light despite showing no clear difference in the chlorophyll  
179 autofluorescence (Coe et al. 2016). The probability of growth after transfer did not depend on the  
180 number of transferred cells (Morris et al. 2008), with as many as  $2.5 \times 10^7$  cells/ml failing to grow after  
181 transfer during culture decline (cells at  $\sim 1/10$  of this density grew after being transferred during  
182 exponential stage). Thus, non-chlorotic cells (defined as being within the range of chlorophyll  
183 autofluorescence exhibited by exponentially-growing cells) are not necessarily viable.

184 As shown in Figure 4, the inability to survive prolonged nitrogen starvation is not unique to  
185 MIT9313, but rather is common to the four tested *Prochlorococcus* strains, covering the major cultured  
186 ecotypes. This is in marked contrast to the ability of (presumably axenic) cultures of two freshwater  
187 cyanobacteria, *Synechococcus* PCC 7942 and *Synechocystis* PCC 6803, to revive after extended N  
188 starvation (Sauer et al. 2001, Klotz et al. 2016). However, when co-cultured with a heterotrophic



189 bacterium, *Alteromonas* HOT1A3, all *Prochlorococcus* strains were able to re-grow after 60 days of N  
190 stress. Interestingly, strain MIT9313, which was initially inhibited by this *Alteromonas* strain (Figure 4A,  
191 (Sher et al. 2011, Aharonovich and Sher 2016)), was also able to survive long-term starvation in co-  
192 culture, suggesting that fundamentally different interactions occur during exponential growth compared  
193 to long-term, presumably nutrient-limited growth. These results are consistent with the ability of  
194 heterotrophic bacteria to extend the survival time of different *Prochlorococcus* strains under conditions

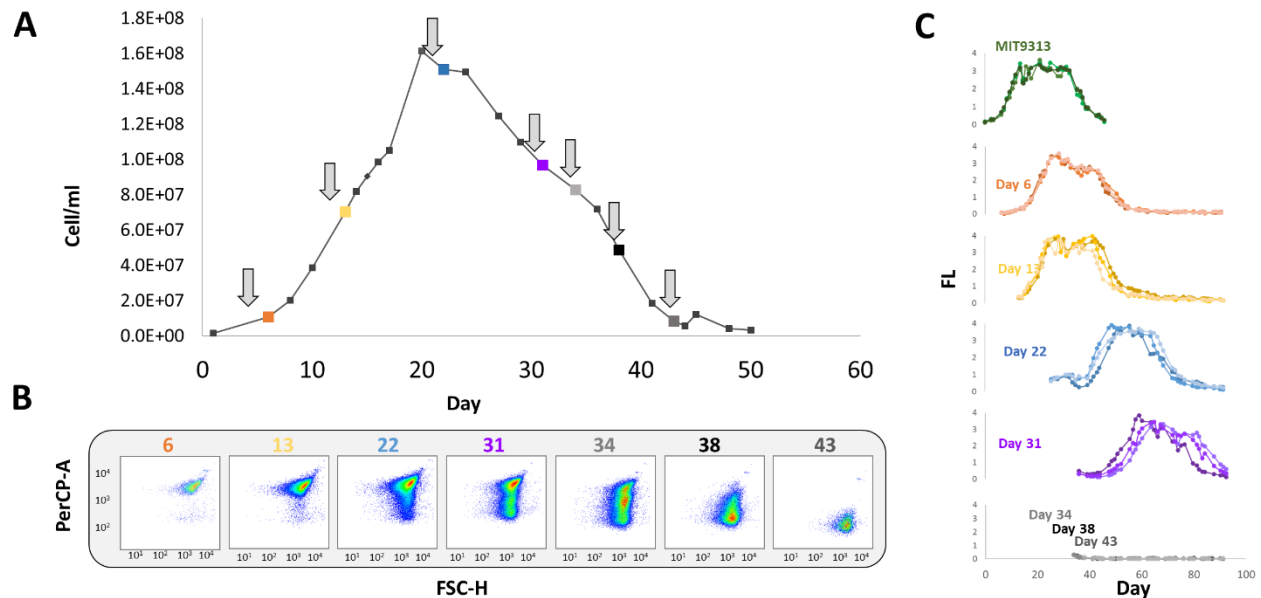

195 of constant darkness (albeit for only several days, (Coe et al. 2016)) and with the ability of different  
196 heterotrophic bacteria to support the long-term viability of batch cultures of *Synechococcus* WH7803  
197 (Christie-Oleza et al. 2017).

198 **Figure 3: Time-dependent changes in viability of cells transferred into fresh media at different life**  
199 **cycle stages of a batch culture.** A) Growth curve of an MIT9313 culture, grown in Pro99, similar to the  
200 experiments shown in Figure 2 and Supplementary Fig. 3, 4 and 7. Arrows indicate the time points at  
201 which triplicate 1ml samples were transferred into fresh media. B) Flow cytometry scatterplots of the  
202 culture shown in panel A. C) Growth curves of cells being transferred at different times to new, nutrient-  
203 replete media (assessed via bulk culture fluorescence). Cells could not re-grow when transferred after  
204 day 34, suggesting that not all high-fl cells are viable, and that mid- and low-fl cells are non-viable.

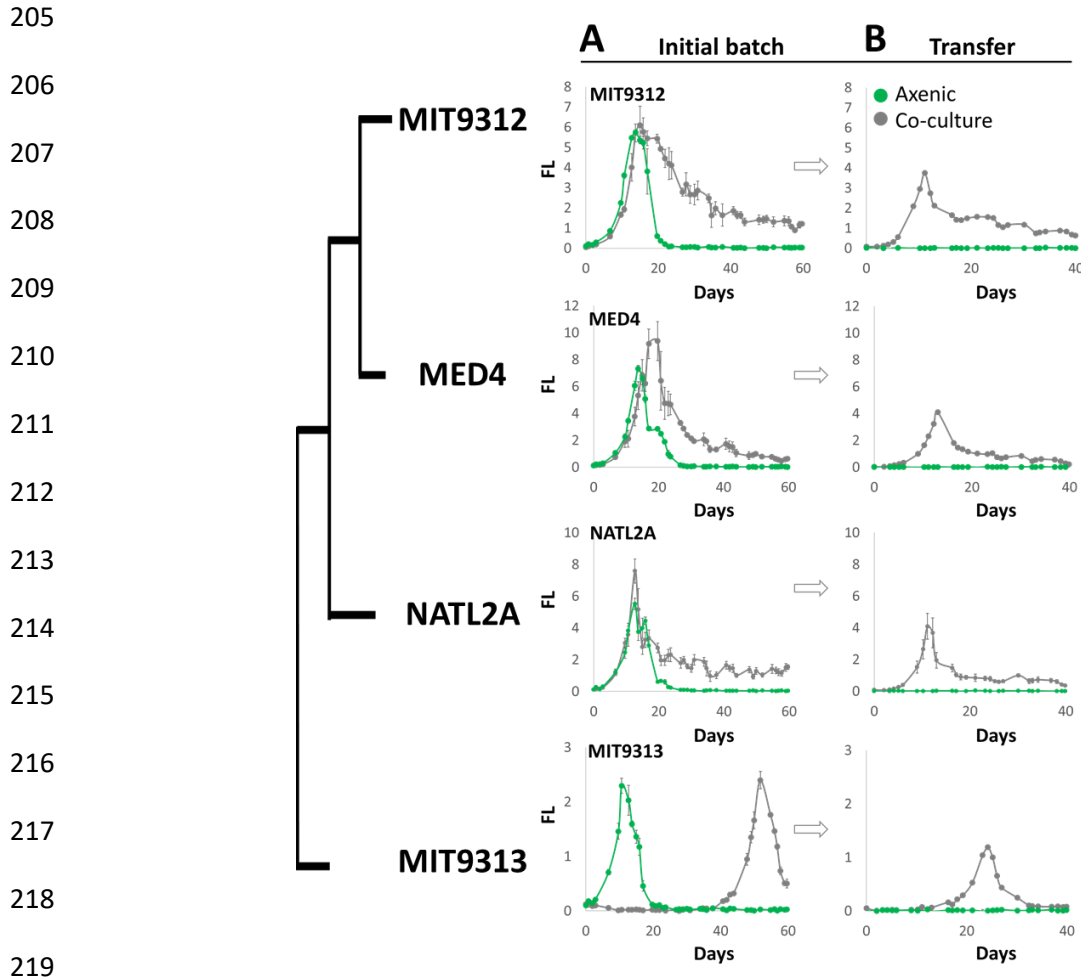

220 **Figure 4: Co-culture with a heterotrophic bacterium, *Alteromonas* HOT1A3, enables multiple**  
221 ***Prochlorococcus* strains to survive long-term N starvation.** Panel A:  $10^6$  axenic *Prochlorococcus* cells/ml  
222 from different strains were incubated alone (green line) or with the addition of  $10^7$  *Alteromonas*  
223 HOT1A3 cells/ml in low-N media (grey line). Bulk culture fluorescence was recorded as a proxy for cell  
224 growth, and 1ml from each culture was transferred into fresh media after 60 days. Panel B: The  
225 transferred cultures were recorded for additional 40 days. Error bars are standard deviation from  
226 triplicate cultures. The late growth of MIT9313 in co-culture is the “delayed growth” phenotype  
227 described in (Sher et al. 2011, Aharonovich and Sher 2016).

228

229

230

231 **Exploring the metabolic activity of naturally occurring sub-populations of *Prochlorococcus* at different**  
232 **depths in the eastern Mediterranean**

233 While chlorotic cells consistently emerge under nutrient starvation in all tested *Prochlorococcus* strains  
234 (Fig 1), environmental conditions in laboratory cultures greatly differ from those in the oligotrophic sea.  
235 For example, cell densities and nutrient concentrations are typically orders of magnitude higher in the  
236 lab than in the nutrient-poor ocean. Indeed, little is known about the prevalence of chlorosis under  
237 natural conditions for phytoplankton in general. Thus, we wondered whether chlorotic *Prochlorococcus*  
238 cells (defined as low-fl and low C and N uptake) can be identified also in nature. We focused on the deep  
239 euphotic zone (100-140m, above the nutricline) where both inorganic nutrient concentrations and light  
240 availability are low. At this depth, “double” *Prochlorococcus* populations, differing by their chlorophyll  
241 auto-fluorescence, have repeatedly been observed (e.g. (Campbell and Vaulot 1993, Moore et al. 1998)).  
242 Previously, these double populations have been shown to contain genetically-different cells belonging to  
243 the High-Light adapted (HL, low chlorophyll) and Low-Light adapted (LL, high chlorophyll) clades (Moore  
244 et al. 1998), However, a recent study using genetic tools suggested that each of the double populations  
245 consists of both HL and LL cells, implying that phenotypic heterogeneity (acclimation) can also  
246 contribute to this phenomenon (Thompson et al. 2018). We therefore asked whether the double  
247 population could also be due to the presence of chlorotic cells, e.g. if LL cells were mixed above the  
248 nutricline, became exposed to nutrient starvation, and subsequently underwent chlorosis. To test this  
249 hypothesis, we characterized the *Prochlorococcus* population structure and single-cell activity (carbon  
250 fixation and  $\text{NH}_4^+$  uptake) during late summer in the ultra-oligotrophic Eastern Mediterranean Sea  
251 (Figure 5A, B). At the time of sampling, the water column was highly stratified and nutrients were  
252 depleted down to around 130m, with a peak in  $\text{NH}_4^+$  concentrations slightly above the nutricline (15nM  
253 at 115m and 125m, Fig. 5B). *Prochlorococcus* were the numerically dominant phytoplankton (Fig 5C),  
254 exhibiting a double population at 115m, but not at samples collected above or below this depth (Fig 5E).  
255 Amplicon sequencing of the Internal Transcribed Spacer between the 16S and 23S genes (ITS,  
256 (Thompson et al. 2018)) revealed that between ~100-137m LL cells (belonging primarily to the LL-I and  
257 LL-IV clades) gradually replace the HL cells, consistent with previous studies (e.g. (Malmstrom et al.  
258 2010)) but contrasting with the sharp delineation between high-chlorophyll and low-chlorophyll  
259 *Prochlorococcus* populations (Fig. 5E, (Thompson et al. 2018)).

260 Mean  $\text{H}^{13}\text{CO}_3^-$  and  $^{15}\text{NH}_4^+$  uptake rates for the majority of the cells sorted from each of the  
261 double *Prochlorococcus* populations at 115m depth were not statistically different, nor were they

262 different from cells collected at greater water depths (Figure 5. F, G, Kruskal-Wallis test,  $p=0.7$  for C and  
263  $p=0.07$  for N). Essentially all of the cells from the Eastern Mediterranean were active, although we did  
264 observe some cells with lower C and N uptake rates in the low-fl population at 115m depth (6/45 cells,  
265 Figure 5F). This contrasts with the observation from our lab experiments, where inactive cells were  
266 observed in all populations, and formed the majority of the cells in the chlorotic (mid- and low-fl)  
267 populations. The observation that essentially all of the *Prochlorococcus* cells in natural samples are  
268 active is consistent with a similar study in the North Pacific (Berthelot et al. 2018).

269           At a depth of 115m light intensity was low (5-6 $\mu$ E during the afternoon), potentially enough to  
270 support the growth of some LL strains but not sufficient for active growth under laboratory conditions of  
271 most HL strains, including those that are present based on the ITS sequences (Moore and Chisholm  
272 1999). However, previous studies based on cell cycle analysis and on  $^{14}$ C incorporation into divinyl-  
273 chlorophyll a have suggested that, even at this depth, *Prochlorococcus* cells divide every 4-7 days  
274 (Goericke and Welschmeyer 1993, Vaultot et al. 1995, Binder et al. 1996, Partensky et al. 1996). The C  
275 uptake rates observed in the cells from 115 and 137m were well below the rate required to support this  
276 division rate ( $\sim 1$  fg cell $^{-1}$  day $^{-1}$ , Table 1). Additionally, unlike the laboratory cultures, in which C  
277 incorporation rates were 3-6 times larger than N-incorporation rates, in our samples from the  
278 Mediterranean Sea the measured C:N uptake ratio was about 1. Thus, the measured C and N uptake  
279 rates suggest that, most likely, *Prochlorococcus* obtain most of the carbon needed for cell growth from  
280 non-photosynthetic sources, i.e. through mixotrophy.

281

282

283

284

285

286

287

288

289  
290  
291  
292  
293  
294  
295  
296  
297  
298  
299  
300  
301  
302  
303  
304  
305  
306  
307  
308

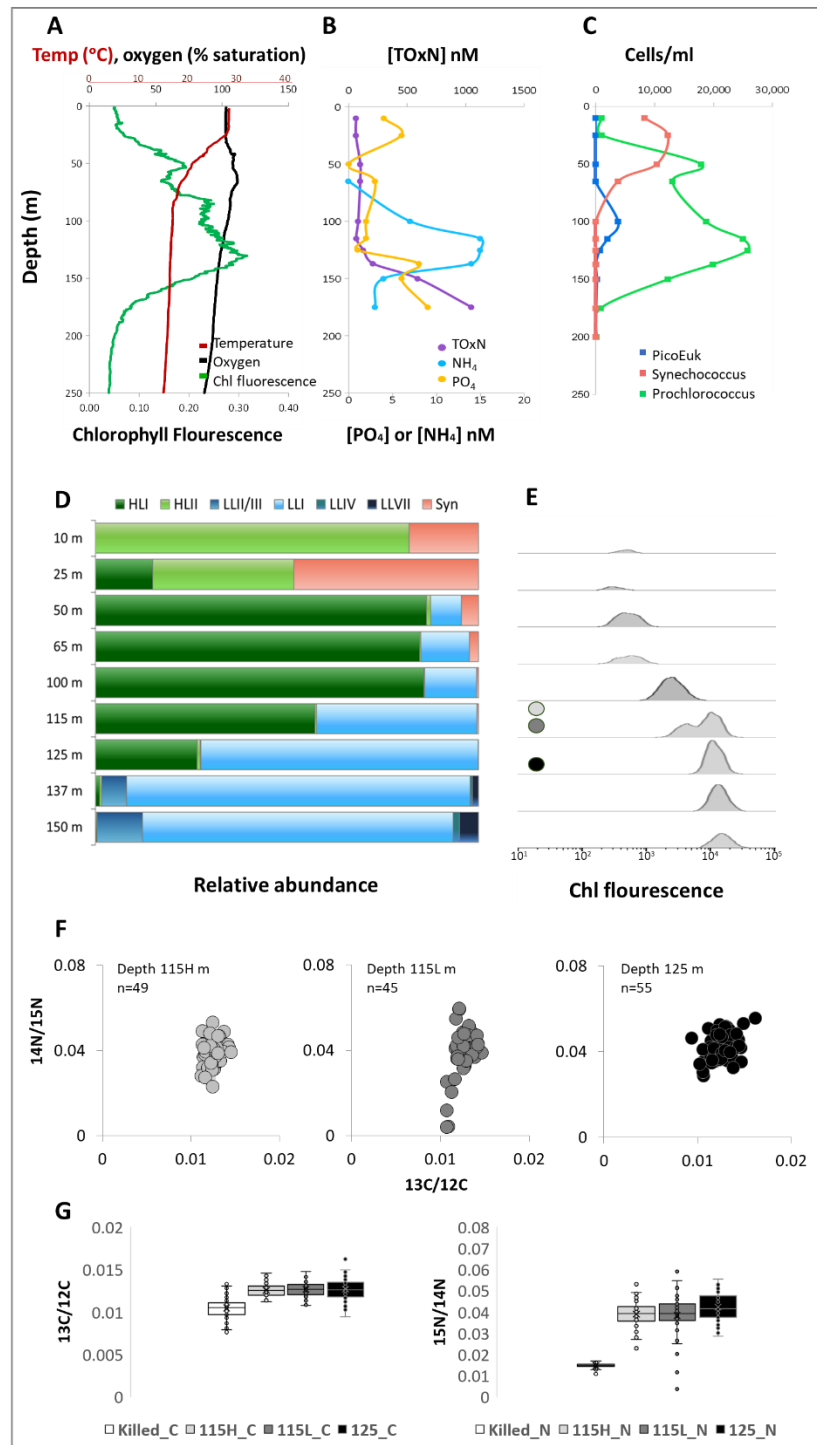

309 **Figure 5: Nutrient uptake of naturally occurring *Prochlorococcus* populations at the Eastern**  
310 **Mediterranean Sea. A-C) Oceanic parameters at the sampling site: Temperature, Oxygen and**

311 Chlorophyll (A); Nutrient concentrations (B); Cell counts by flow cytometry (C). D) Relative abundance of  
312 different *Prochlorococcus* clades across the water column, determined by ITS sequencing. E) Histograms  
313 of chlorophyll autofluorescence, analyzed from flow cytometry of picoplankton throughout the water  
314 column. Note the double population at 115m. F) Scatterplot of  $^{13}\text{C}/^{12}\text{C}$  and  $^{15}\text{N}/^{14}\text{N}$  ratios obtained from  
315 NanoSIMS analysis of each sorted sub-population from 115m and the single population from 125m. G)  
316 Boxplots of the  $^{13}\text{C}/^{12}\text{C}$  and  $^{15}\text{N}/^{14}\text{N}$  enrichment in each sub-population. Lines represent the median, X  
317 represents the mean, box borders are 1<sup>st</sup> quartiles and whiskers represent the full range. The three  
318 populations did not statistically differ (Kruskal-Wallis test,  $p < 0.001$ ).

### 319 **Stress survival in pico-cyanobacteria: why is *Prochlorococcus* different?**

320 In this study, we demonstrate that phenotypic heterogeneity between clonal *Prochlorococcus* cells  
321 occurs at multiple “scales”. In exponentially growing axenic laboratory cultures C and N uptake rates  
322 differ significantly between individual cells. This variation is independent of genetic variability.  
323 Additionally, as axenic cultures become stressed, a larger phenotypic change occurs as cells lose their  
324 chlorophyll auto-fluorescence and become chlorotic. Under these experimental conditions, most cells  
325 are inactive (primarily in the low-fl population), although, due to the level of sensitivity of the  
326 NanoSIMS, we cannot rule out that even low-fl cells still retain a residual level of activity. Some cells  
327 from the chlorotic populations retain at least part of their photosynthetic capacity, and indeed can fix  
328 carbon and take up  $\text{NH}_4$ . Yet, in our experiments, they do not re-grow when condition become more  
329 favorable. In *Synechococcus elegantus* PCC 7942, chlorotic cultures retain approximately 0.01% of their  
330 photosynthetic activity, as well as a residual level of protein translation, although it remains unclear  
331 whether this is a process shared by all cells in the culture or whether this activity is only due to a small  
332 subset of more active cells (Sauer et al. 2001). The clear difference between the ability of axenic  
333 *Synechococcus elegantus* PCC 7942 and *Synechocystis* PCC6803 to survive long-term N starvation, and  
334 the inability of axenic *Prochlorococcus* cultures to do so, suggests an inherent difference in the  
335 physiology and genomic functional capacity between these unicellular cyanobacteria.

336 Entry into chlorosis in *Synechocystis* is a regulated process that involves the organized degradation of  
337 the phycobilisomes in parallel with an increase in the storage products glycogen and  
338 polyhydroxybutyrate (PHB) (Klotz et al. 2016). The photosynthesis apparatus of *Prochlorococcus* is  
339 different from that of other cyanobacteria, using unique chlorophyll a2/b2 binding proteins rather than  
340 phycobilisomes (Ting et al. 2002), and indeed they lack orthologs of the nblA gene required for

341 phycobilisome degradation during chlorosis (Klotz et al. 2016). Additionally, while *Prochlorococcus* likely  
342 use glycogen as a C storage pool (Lichtlé et al. 1995), they lack the *phaA-C* and *phaE* genes required for  
343 PHB biosynthesis and which are induced in *Synechocystis* PCC 6803 under chlorosis (although these  
344 genes are not required for revival from chlorosis (Klotz et al. 2016)). Taken together, these differences  
345 suggest that *Prochlorococcus* lack the genetic toolkit employed by *Synechocystis* PCC6803 and  
346 *Synechococcus elegantus* PCC7942 to enter into a resting stage.

347 If *Prochlorococcus* are indeed incapable of producing resting stages in response to nutrient or light  
348 starvation, what are the evolutionary drivers of this phenotype, and what are the consequences for the  
349 dynamics of *Prochlorococcus* populations in the ocean? While the open oligotrophic ocean is often  
350 considered a relatively stable environment, nutrient concentrations do fluctuate, and phytoplankton  
351 (including *Prochlorococcus*) inhabiting these waters show multiple signs of nutrient stress (Moore et al.  
352 2013, Saito et al. 2014). Many of the microbes that live in such environments comprising a large fraction  
353 of the surface ocean have small, highly streamlined genomes (Yooseph et al. 2010) and this has been  
354 suggested to be an adaptation to low nutrient concentrations (Yooseph et al. 2010, Biller et al. 2014,  
355 Giovannoni 2017). It is possible that the lack of resting stages is a result of this genome streamlining (the  
356 genomes of *Synechococcus elegantus* PCC7942 and *Synechocystis* PCC6803 are ~3.2mbp and ~4mbp  
357 with their plasmids, respectively, compared to ~1.4-2.5 mbp for *Prochlorococcus* strains).

### 358 **Surviving nutrient stress “with a little help from my friends”.**

359 Despite the clear effect of nutrient stress on *Prochlorococcus* in laboratory culture, manifesting in  
360 chlorosis and reduction of vitality, we observed relatively few less-active (potentially chlorotic)  
361 *Prochlorococcus* cells in the deep euphotic zone of the Eastern Mediterranean (approximately 5% of the  
362 population at 115m, Figure 5F). It is possible that cell stress and chlorosis change as a function of the  
363 diel cycle, and indeed previous studies have suggested *Prochlorococcus* cell mortality increases during  
364 the night (Llabrés et al. 2011, Ribalet et al. 2015). As the sampling of natural population in the Eastern  
365 Mediterranean Sea took place during the day (~12:00-16:00) we cannot exclude this hypothesis.  
366 Alternatively, *Prochlorococcus* may actually never experience nutrient starvation in the oceans. While  
367 physiological and molecular analyses of field populations of *Prochlorococcus* suggest that the cells are  
368 nutrient-limited (e.g. (Saito et al. 2014, Szul et al. 2019)), cell growth and death are usually balanced,  
369 suggesting these cells are not experiencing acute starvation (e.g. (Ribalet et al. 2015)). The ability of  
370 *Prochlorococcus* to thrive under conditions of extreme nutrient limitation is often explained by their

371 small cell size (increasing their biomass-specific diffusion), their generally low nutrient requirements,  
372 and their specific metabolic strategies to minimize the per-cell elemental quotas (Van Mooy et al. 2006,  
373 Gilbert and Fagan 2011, Read et al. 2017). We propose that interactions with co-occurring  
374 microorganisms, e.g. through the recycling of inorganic nutrients or the exchange of organic  
375 compounds, enable *Prochlorococcus* to survive when these nutrient-saving mechanisms are not  
376 sufficient. Indeed, the observation that *Prochlorococcus* can compete with heterotrophic bacteria for  
377 amino acids (Zubkov et al. 2004), carbohydrates (Muñoz-Marín et al. 2013) and perhaps DMSP (Vila-  
378 Costa et al. 2006, Becker et al. 2019) suggests that mixotrophy is prevalent and important in natural  
379 communities. This is supported by genomic analyses (Rocap et al. 2003, Yelton et al. 2016). The  
380 importance of mixotrophy is not limited to organic forms of N, P or Fe, but can be extended to light (or  
381 resulting C) stress. Illustrating the potential magnitude of this effect, an average of ~8-10% of the  
382 *Prochlorococcus* cells at HOT and BATS (Hawaii and Bermuda time series study sites, respectively  
383 (Malmstrom et al. 2010)), are found under conditions where the average integrated illumination is not  
384 enough to support their growth under laboratory conditions (Sup Fig. S7, see supplementary text for  
385 more details (Moore and Chisholm 1999)). This includes the vast majority of LL adapted ecotypes.  
386 Previous studies have shown that uptake of glucose by *Prochlorococcus* cells in the central Atlantic  
387 Ocean can support up to ~20% of their carbon requirements, supporting the notion of mixotrophy  
388 (Muñoz-Marín et al. 2013, Muñoz-Marín et al. 2017). However, glucose uptake is light dependent and  
389 occurs at higher rates in the surface ocean, suggesting that some other form of DOC is likely important  
390 in the deep euphotic zone. Amino acids provide another potential DOC form, which can supply both N  
391 and C to the cells. Indeed, cell-specific amino acid uptake rates of *Prochlorococcus* from the southern  
392 Atlantic Ocean increase with depth, and high-fl cells take up more than low-fl cells, although to what  
393 extent this supports the C and N needs of the cells is unknown (Zubkov et al. 2004). Regardless of the  
394 specific forms of dissolved organic carbon being utilized by the cells, the lack of any mechanism for the  
395 production of resting stages by *Prochlorococcus* may be considered another manifestation of the “Black  
396 Queen Hypothesis”, which states that microorganisms “outsource” essential survival mechanisms such  
397 as detoxification of reactive oxygen species to the surrounding microbial community (Morris et al. 2012).  
398 These forms of microbial interactions likely affect the distribution and activity of *Prochlorococcus* on a  
399 global scale (Hennon et al. 2017, Ma et al. 2017).

400

401



## 402 **Material and Methods**

### 403 **Prochlorococcus growth and Stable Isotope Incubations**

404 Axenic *Prochlorococcus* strains were grown in Pro99 media under constant cold white light (27  $\mu$ E) at  
405 22 °C. Bulk chlorophyll fluorescence (FL) (ex440; em680) was measured almost daily using a  
406 Fluorescence Spectrophotometer (Cary Eclipse, Varian). In parallel, samples for flow cytometry were  
407 taken for cell numbers. When three distinct sub-populations appeared in the flow cytometry, the  
408 cultures were labeled with 1mM Sodium bicarbonate-<sup>13</sup>C and 1mM Ammonium-<sup>15</sup>N chloride (Sigma-  
409 Aldrich, USA) for 18-24 hours. The optimal incubation time based on preliminary isotope labeling  
410 experiments with *Prochlorococcus* MED (Supplementary figure 8). Incubations were stopped by fixing 2  
411 ml of the culture with 2X EM grade glutaraldehyde (2.5% final concentration) and subsequently storing  
412 at 4 °C until the sorting analysis. Non-labeled cells that were killed before labeling (by adding 2.5%  
413 glutaraldehyde) were used as a negative control.

414

### 415 **Cell Sorting and Filtration**

416 Sorting of sub-population was carried out using a BD FACSAria III sorter (BD Biosciences) at the Life  
417 Sciences and Engineering Infrastructure Center, Technion, Israel. Each sample was sorted for 3 sub-  
418 populations: Non-chlorotic (High-fl), Semi chlorotic (Mid-fl) and Chlorotic (Low-fl) (Figure 2A). The  
419 sorting gates for each sub-population were determined from the population observed in forward scatter  
420 (FSC, a proxy for cell size) and auto-fluorescence (PerCP, chlorophyll auto-fluorescence). After sorting,  
421 the sorted sub-population were gently filtered on 13 mm diameter polycarbonate filters (GTTP, 0.2  $\mu$ M  
422 pore size, Millipore, MA), washed twice with sterile sea water and air-dried. The filters were stored at 4  
423 °C until nanoSIMS analyses.

424

### 425 **Nanoscale secondary ion mass spectrometry (nanoSIMS) and data analysis**

426 The samples were coated with a layer of ca. 30 nm gold with a Cressington 108 auto sputter coater  
427 (Watford, United Kingdom). Random spots were employed for NanoSIMS analyses. SIMS imaging was  
428 performed using a NanoSIMS 50L instrument (Cameca, Paris, France) at the Leibniz-Institute for Baltic  
429 Sea Research Warnemünde (IOW). A <sup>133</sup>Cs<sup>+</sup> primary ion beam was used to erode and ionize atoms of the  
430 sample. Images of secondary electrons, <sup>12</sup>C<sup>-</sup>, <sup>13</sup>C<sup>-</sup>, <sup>12</sup>C<sup>14</sup>N<sup>-</sup> and <sup>12</sup>C<sup>15</sup>N<sup>-</sup> were recorded simultaneously using  
431 mass detectors equipped with electron multipliers (Hamamatsu). The mass resolving power was  
432 adjusted to be sufficient to suppress interferences at all masses allowing, e.g. the separation of <sup>13</sup>C from  
433 interfering ions such as <sup>12</sup>C<sup>1</sup>H<sup>-</sup>. Prior to the analysis, sample areas of 50x50  $\mu$ m were sputtered for 2 min

434 with 600 pA to erode the gold, clean the surface and reach the steady state of secondary ion formation.  
435 The primary ion beam current during the analysis was 1 pA; the scanning parameters were 512×512  
436 pixels for areas of 30x30 to 48x48 μm, with a dwell time of 250 μs per pixel. 60 planes were analysed.  
437

#### 438 **Analyses of NanoSIMS measurements**

439 All NanoSIMS measurements were analysed with the Matlab based program look@nanosims (Polerecky  
440 et al., 2012). Briefly, the 60 measured planes were checked for inconsistencies and all usable planes  
441 accumulated, regions of interest (ROI's) (i.e. Prochlorococcus cells and filter regions without organic  
442 material for background measurements) defined based on <sup>12</sup>C/<sup>14</sup>N mass pictures, and <sup>13</sup>C/<sup>12</sup>C as well as  
443 <sup>12</sup>C/<sup>15</sup>N/<sup>12</sup>C/<sup>14</sup>N ratios calculated from the ion signals for each region of interest.

#### 444 **Uptake rate calculation**

445 Uptake rate was estimated using the following equation, based on that of (Legendre and Gosselin 1997),  
446 as follows:

$$447 \quad V = \frac{(\%P_t^* - \%P_0^*) Q}{(\%D_i^* - \%D_0^*) t}$$

448 Where %P<sub>t</sub><sup>\*</sup> is the concentration (atom %) of the heavy isotope in the particulate matter at the end of  
449 the incubation, %D<sub>i</sub><sup>\*</sup> is the concentration of the dissolved tracer added to the incubation (and assumed  
450 not to change over the short incubation time), and %P<sub>0</sub><sup>\*</sup> and %D<sub>0</sub><sup>\*</sup> are the natural heavy isotope  
451 concentrations in the particulate and dissolved matter, respectively. We estimated Q, the cell quota (in  
452 fg cell<sup>-1</sup>) of C or N, based on measurements of the biomass of MED4 and MIT9313 (66 fg cell<sup>-1</sup> and 158 fg  
453 cell<sup>-1</sup>, respectively, (Cermak et al. 2016)) and assuming that C comprises 50% and N comprises 7.5% of  
454 the cell biomass. For heavy isotopes concentration in the particulate and dissolved phases before  
455 incubation we used the natural values for isotopic ratios of <sup>13</sup>C and <sup>15</sup>N (1.12% and 0.37% respectively).  
456 For the experiment shown in Supplementary Fig. 8, we measured the NH<sub>4</sub><sup>+</sup> concentration in the media  
457 and added the <sup>15</sup>N tracer to 50% final concentration. Since all other experiments were performed in  
458 declining cultures we assumed that the NH<sub>4</sub><sup>+</sup> was depleted from the media, and thus %D<sub>t</sub><sup>\*</sup> was defined  
459 as 90%, based on previous measurements of NH<sub>4</sub><sup>+</sup> concentrations in old cultures. We used a value of  
460 50% for the initial percentage of <sup>13</sup>C, based on dissolved inorganic carbon (DIC) measurements  
461 (Grossowicz et al. 2017). For the terminal concentrations of <sup>15</sup>N and <sup>13</sup>C in the particulate phase (%P<sub>t</sub><sup>\*</sup>) we  
462 used the values of <sup>13</sup>C/<sup>12</sup>C and <sup>15</sup>N/<sup>14</sup>N that were obtained from the NanoSIMS analysis of the cells.

463  $^{13}\text{C}/^{12}\text{C}$  and  $^{15}\text{N}/^{14}\text{N}$  below the natural values resulted with negative uptake values, and were treated as  
464 zero uptake.

465 Mean and standard deviation of C and N uptake rates were calculated from the uptake rate values of  
466 individual cells (Table 1). The uptake rate values were not corrected for negative control (killed cells),  
467 which are presented for comparison in table 1. Since  $^{13}\text{C}/^{12}\text{C}$  and  $^{15}\text{N}/^{14}\text{N}$  values of individual cells were  
468 not normally distributed, for significance analysis we used non-parametric tests (Mann-Whitney and  
469 Kruskal-Wallis tests) performed using the Real Statistics Resource Pack software (Release 5.4 [www.real-](http://www.real-statistics.com)  
470 [statistics.com](http://www.real-statistics.com)).

## 471 **Isotope labelling and phylogenetic analysis of a natural marine bacterioplankton population at sea**

### 472 **Water collection and labelling experiment procedure**

473 Mediterranean seawater was collected during August 2017 (station N1200, 32.45 degrees N, 34.37  
474 degrees E) from 11 depths by Niskin bottles and divided into triplicates of 250 ml polycarbonate bottles.  
475 Two bottles from each depth were labeled with 1mM Sodium bicarbonate- $^{13}\text{C}$  and 1mM Ammonium- $^{15}\text{N}$   
476 chloride (Sigma-Aldrich, USA) and all 3 bottles (2 labelled and 1 control) were incubated at the original  
477 depth and station at sea for 3.5 hours on day time. After incubation, bottles were brought back on board  
478 and the incubations were stopped by fixing with 2X EM grade glutaraldehyde (2.5% final concentration)  
479 and stored at 4 °C until sorting analysis.

480

### 481 **DNA collection and extraction from seawater**

482 Samples for DNA collected on a 0.22  $\mu\text{m}$  sterivex filters (Millipore). Excess water was removed using a  
483 syringe and 1 ml Lysis buffer (40 mM EDTA, 50 mM Tris pH 8.3, 0.75 M sucrose) was added and both  
484 ends were closed with parafilm. Samples were kept at -80°C until extraction. DNA extracted by using a  
485 semi-automated protocol includes manually chemical cell lysis before the automated steps. The manual  
486 protocol began with thawing the samples, then the storage buffer was removed using a syringe and 170  
487  $\mu\text{l}$  lysis buffer added to the filter. 30  $\mu\text{l}$  of Lysozyme (20 mg/ml) added to filters and incubate at 37°C for  
488 30 min. After incubation, 20  $\mu\text{l}$  proteinase K and 200  $\mu\text{l}$  Buffer AL added to the tube for 1 hour at 56°C  
489 (with agitation). Then, the supernatant transferred to a new tube, which subjected to the QIAcube  
490 automated system (at the BioRap unit, Faculty of Medicine, Technion) following the manufacturer's  
491 instructions using QIAamp DNA Mini Protocol: DNA Purification from Blood or Body Fluids (Spin  
492 Protocol) from step 6. All DNA samples were eluted in 100  $\mu\text{l}$  DNA free distilled-water.

493

#### 494 **16S and ITS PCR amplification**

495 PCR amplification of the ITS was carried out with specific primers for *Prochlorococcus* CS1\_16S\_1247F  
496 (5'-ACACTGACGACATGGTTCTACACGTACTACAATGCTACGG) and Cs2\_ITS\_Ar (5'-  
497 TACGGTAGCAGAGACTTGGTCTGGACCTCACCTTATCAGGG) (Thompson et al. 2018). The first PCR was  
498 performed in triplicate in a total volume of 25 µl containing 0.5 ng of template, 12.5 µl of MyTaq Red  
499 Mix (Bioline) and 0.5 µl of 10 µM of each primer. The amplification conditions comprised steps at 95°C  
500 for 5 min, 28/25 (16S/ITS) cycles at 95°C for 30 sec, 50°C for 30 sec and 72°C for 1 min followed by one  
501 step of 5 min at 72°C. All PCR products validated on 1% agarose gel and triplicates were pooled.  
502 Subsequently, a second PCR amplification was performed to prepare libraries. These were pooled and  
503 after a quality control sequenced (2x250 paired-end reads) using an Illumina MiSeq sequencer. Library  
504 preparation and pooling were performed at the DNA Services (DNAS) facility, Research Resources Center  
505 (RRC), University of Illinois at Chicago (UIC). MiSeq sequencing was performed at the W.M. Keck Center  
506 for Comparative and Functional Genomics at the University of Illinois at Urbana-Champaign (UIUC).

507

508 **ITS Sequence processing** Paired-end reads, in the format of fastq files were analyzed by the DADA2  
509 pipeline (<https://www.nature.com/articles/nmeth.3869>). Quality of the sequences per sample was  
510 examined using the Dada2 'plotQualityProfile' command. Quality filtering was done using the Dada2  
511 'filterAndTrim' command with parameters for quality filtering were truncLen=c(290,260), maxN=0,  
512 maxEE=c(2,2), truncQ=2, rm.phix=TRUE, trimLeft=c(20,20). Following error estimation and dereplication,  
513 the dada algorithm was used to correct sequences. Merging of the forward and reverse reads was done  
514 with minimum overlap of 4 bp. Detection and removal of suspected chimera was done with command  
515 'removeBimeraDenovo'. In total, 388,417 sequences in 484 amplicon sequence variants (ASVs) were  
516 counted. The ASVs were aligned in MEGA6 (Tamura et al. 2013) and the first ~295 nucleotides,  
517 corresponding to the 16S gene, were trimmed. The ITS sequences were then classified using BLAST  
518 against a custom database of ITS sequences from cultured *Prochlorococcus* and *Synechococcus* strains  
519 as well as from uncultured HL and LL clades.

#### 520 **Acknowledgements**

521 We thank the captain and crew of the R/V Mediterranean Explorer and Tom Reich, for help during the  
522 work at sea, Maya Lalar for assistance with the bioinformatics analysis and Annett Grützmüller  
523 NanoSIMS routine operation. This study was supported by grant RGP0020/2016 from the Human  
524 Frontiers Science Program (to MV, HPG and DS) and by grant number 1635070/2016532 from the NSF-

525 BSF program in Oceanography (NSFOCE-BSF, to DS). The NanoSIMS at the Leibnitz-Institute for Baltic Sea  
526 research in Warnemuende (IOW) was funded by the German Federal Ministry of Education and  
527 Research (BMBF), grant identifier 03F0626A.

528

### 529 **Author contributions**

530 DRR, DA, TLK, AV, MV and DS designed experiments, DRR, DA, TLK, LZ, NN and DS performed  
531 experiments and field analyses, DRR, DA, TLK, AV, and FE performed NanoSIMS analyses, DRR, DA, TLK,  
532 AV, LZ, FE, NN, HPG, MV and DS analyzed results, DRR, DA, TLK and DS wrote manuscript with  
533 contributions from all authors.

534

### 535 **Competing interests**

536 The authors declare no competing interests

537

### 538 **Materials and Correspondence**

539 Please send requests for materials or other correspondence to Daniel Sher, [dsher@univ.haifa.ac.il](mailto:dsher@univ.haifa.ac.il)

540

### 541 **References:**

- 542 Aharonovich, D. and D. Sher (2016). "Transcriptional response of Prochlorococcus to co-culture with a  
543 marine Alteromonas: differences between strains and the involvement of putative infochemicals." ISME  
544 J **10**(12): 2892-2906.
- 545 Anderson, T. R., J. R. Christian and K. J. Flynn (2015). Chapter 15 - Modeling DOM Biogeochemistry.  
546 Biogeochemistry of Marine Dissolved Organic Matter (Second Edition). D. A. Hansell and C. A. Carlson.  
547 Boston, Academic Press: 635-667.
- 548 Barton, A. D., S. Dutkiewicz, G. Flierl, J. Bragg and M. J. Follows (2010). "Patterns of diversity in marine  
549 phytoplankton." Science **327**(5972): 1509-1511.
- 550 Becker, J. W., S. L. Hogle, K. Rosendo and S. W. Chisholm (2019). "Co-culture and biogeography of  
551 Prochlorococcus and SAR11." The ISME Journal.
- 552 Behrenfeld, M. J. and P. G. Falkowski (1997). "Photosynthetic rates derived from satellite-based  
553 chlorophyll concentration." Limnology and Oceanography **42**(1): 1-20.
- 554 Bergkessel, M., D. W. Basta and D. K. Newman (2016). "The physiology of growth arrest: uniting  
555 molecular and environmental microbiology." Nature Reviews Microbiology **14**: 549.
- 556 Berthelot, H., S. Duhamel, S. L'Helguen, J.-F. Maguer, S. Wang, I. Cetinić and N. Cassar (2018).  
557 "NanoSIMS single cell analyses reveal the contrasting nitrogen sources for small phytoplankton." The  
558 ISME Journal.
- 559 Biller, S. J., P. M. Berube, D. Lindell and S. W. Chisholm (2014). "Prochlorococcus: the structure and  
560 function of collective diversity." Nature Reviews Microbiology **13**: 13.
- 561 Binder, B. J., S. W. Chisholm, R. J. Olson, S. L. Frankel and A. Z. Worden (1996). "Dynamics of  
562 picophytoplankton, ultraphytoplankton and bacteria in the central equatorial Pacific." Deep Sea  
563 Research Part II: Topical Studies in Oceanography **43**(4): 907-931.

564 Campbell, L. and D. Vaultot (1993). "Photosynthetic picoplankton community structure in the subtropical  
565 North Pacific Ocean near Hawaii (station ALOHA)." Deep Sea Research Part I: Oceanographic Research  
566 Papers **40**(10): 2043-2060.

567 Cermak, N., J. W. Becker, S. M. Knudsen, S. W. Chisholm, S. R. Manalis and M. F. Polz (2016). "Direct  
568 single-cell biomass estimates for marine bacteria via Archimedes' principle." The ISME Journal **11**: 825.

569 Christie-Oleza, J. A., D. Sousoni, M. Lloyd, J. Armengaud and D. J. Scanlan (2017). "Nutrient recycling  
570 facilitates long-term stability of marine microbial phototroph–heterotroph interactions." Nature  
571 Microbiology **2**: 17100.

572 Coe, A., J. Ghizzoni, K. LeGault, S. Biller, S. E. Roggensack and S. W. Chisholm (2016). "Survival of  
573 Prochlorococcus in extended darkness." Limnology and Oceanography **61**(4): 1375-1388.

574 de Abreu Meireles, D., J. Schripsema, A. C. Vetö Arnholdt and D. Dagnino (2015). "Persistence of Only a  
575 Minute Viable Population in Chlorotic Microcystis aeruginosa PCC 7806 Cultures Obtained by Nutrient  
576 Limitation." PLOS ONE **10**(7): e0133075.

577 Del Giorgio, P. A. and J. M. Gasol (2008). Physiological Structure and Single-Cell Activity in Marine  
578 Bacterioplankton. Microbial Ecology of the Oceans. D. L. Kirchman.

579 Engl, C. (2018). "Noise in bacterial gene expression." Biochemical Society Transactions: BST20180500.

580 Flombaum, P., J. L. Gallegos, R. A. Gordillo, J. Rincón, L. L. Zabala, N. Jiao, D. M. Karl, W. K. W. Li, M. W.  
581 Lomas, D. Veneziano, C. S. Vera, J. A. Vrugt and A. C. Martiny (2013). "Present and future global  
582 distributions of the marine Cyanobacteria Prochlorococcus and Synechococcus." Proceedings of the  
583 National Academy of Sciences **110**(24): 9824-9829.

584 Franklin, D. J., C. P. D. Brussaard and J. A. Berges (2006). "What is the role and nature of programmed  
585 cell death in phytoplankton ecology?" European Journal of Phycology **41**(1): 1-14.

586 GILBERT, J. D. J. and W. F. FAGAN (2011). "Contrasting mechanisms of proteomic nitrogen thrift in  
587 Prochlorococcus." Molecular Ecology **20**(1): 92-104.

588 Giovannoni, S. J. (2017). "SAR11 Bacteria: The Most Abundant Plankton in the Oceans." Annual Review  
589 of Marine Science **9**(1): 231-255.

590 Goericke, R. and N. A. Welschmeyer (1993). "The marine prochlorophyte Prochlorococcus contributes  
591 significantly to phytoplankton biomass and primary production in the Sargasso Sea." Deep Sea Research  
592 Part I: Oceanographic Research Papers **40**(11): 2283-2294.

593 Grossowicz, M., D. Roth-Rosenberg, D. Aharonovich, J. Silverman, M. J. Follows and D. Sher (2017).  
594 "Prochlorococcus in the lab and in silico: The importance of representing exudation." Limnology and  
595 Oceanography **62**(2): 818-835.

596 Harms, A., E. Maisonneuve and K. Gerdes (2016). "Mechanisms of bacterial persistence during stress and  
597 antibiotic exposure." Science **354**(6318): aaf4268.

598 Hennon, G. M. M., J. J. Morris, S. T. Haley, E. R. Zinser, A. R. Durrant, E. Entwistle, T. Dokland and S. T.  
599 Dyhrman (2017). "The impact of elevated CO<sub>2</sub> on Prochlorococcus and microbial interactions with  
600 'helper' bacterium Alteromonas." The ISME Journal **12**: 520.

601 Jones, S. E. and J. T. Lennon (2010). "Dormancy contributes to the maintenance of microbial diversity."  
602 Proceedings of the National Academy of Sciences **107**(13): 5881-5886.

603 Jørgensen, B. B., M. A. Lever, K. L. Rogers, K. G. Lloyd, J. Overmann, B. Schink, R. K. Thauer and T. M.  
604 Hoehler (2015). "Life under extreme energy limitation: a synthesis of laboratory- and field-based  
605 investigations." FEMS Microbiology Reviews **39**(5): 688-728.

606 Kashtan, N., S. E. Roggensack, S. Rodrigue, J. W. Thompson, S. J. Biller, A. Coe, H. M. Ding, P. Marttinen,  
607 R. R. Malmstrom, R. Stocker, M. J. Follows, R. Stepanauskas and S. W. Chisholm (2014). "Single-Cell  
608 Genomics Reveals Hundreds of Coexisting Subpopulations in Wild Prochlorococcus." Science **344**(6182):  
609 416-420.

610 Klotz, A., J. Georg, L. Bučinská, S. Watanabe, V. Reimann, W. Januszewski, R. Sobotka, D. Jendrossek,  
611 Wolfgang R. Hess and K. Forchhammer (2016). "Awakening of a Dormant Cyanobacterium from Nitrogen  
612 Chlorosis Reveals a Genetically Determined Program." *Current Biology* **26**(21): 2862-2872.

613 Krumhardt, K. M., K. Callnan, K. Roache-Johnson, T. Swett, D. Robinson, E. N. Reistetter, J. K. Saunders,  
614 G. Rocap and L. R. Moore (2013). "Effects of phosphorus starvation versus limitation on the marine  
615 cyanobacterium *Prochlorococcus* MED4 I: uptake physiology." *Environmental Microbiology* **15**(7): 2114-  
616 2128.

617 Lichtlé, C., J. C. Thomas, A. Spilar and F. Partensky (1995). "Immunological and ultrastructural  
618 characterization of the photosynthetic complexes of the prochlorophyte *Prochlorococcus*  
619 (oxygenic bacteria)." *Journal of Phycology* **31**(6): 934-941.

620 Ma, L., B. C. Calfee, J. J. Morris, Z. I. Johnson and E. R. Zinser (2017). "Degradation of hydrogen peroxide  
621 at the ocean's surface: the influence of the microbial community on the realized thermal niche of  
622 *Prochlorococcus*." *The ISME Journal* **12**: 473.

623 Malmstrom, R. R., A. Coe, G. C. Kettler, A. C. Martiny, J. Frias-Lopez, E. R. Zinser and S. W. Chisholm  
624 (2010). "Temporal dynamics of *Prochlorococcus* ecotypes in the Atlantic and Pacific oceans." *ISME J.*

625 Martiny, A. C., M. L. Coleman and S. W. Chisholm (2006). "Phosphate acquisition genes in  
626 *Prochlorococcus* ecotypes: evidence for genome-wide adaptation." *Proc Natl Acad Sci U S A* **103**(33):  
627 12552-12557.

628 Mary, I., L. Garczarek, G. A. Tarran, C. Kolowrat, M. J. Terry, D. J. Scanlan, P. H. Burkil and M. V. Zubkov  
629 (2008). "Diel rhythmicity in amino acid uptake by *Prochlorococcus*." *Environmental Microbiology* **10**(8):  
630 2124-2131.

631 Matantseva, O., S. Skarlato, A. Vogts, I. Pozdnyakov, I. Liskow, H. Schubert and M. Voss (2016).  
632 "Superposition of Individual Activities: Urea-Mediated Suppression of Nitrate Uptake in the  
633 Dinoflagellate *Prorocentrum minimum* Revealed at the Population and Single-Cell Levels." *Frontiers in*  
634 *Microbiology* **7**(1310).

635 Moore, L. R. and S. W. Chisholm (1999). "Photophysiology of the marine cyanobacterium  
636 *Prochlorococcus*: Ecotypic differences among cultured isolates." *Limnology and Oceanography* **44**(3):  
637 628-638.

638 Moore, L. R., G. Rocap and S. W. Chisholm (1998). "Physiology and molecular phylogeny of coexisting  
639 *Prochlorococcus* ecotypes." *Nature* **393**(6684): 464-467.

640 Morris, J. J., R. E. Lenski and E. R. Zinser (2012). "The Black Queen Hypothesis: Evolution of  
641 Dependencies through Adaptive Gene Loss." *mBio* **3**(2).

642 Muñoz-Marín, M. d. C., I. Luque, M. V. Zubkov, P. G. Hill, J. Diez and J. M. García-Fernández (2013).  
643 "*Prochlorococcus* can use the Pro1404 transporter to take up glucose at nanomolar concentrations in  
644 the Atlantic Ocean." *Proceedings of the National Academy of Sciences* **110**(21): 8597-8602.

645 Partensky, F., J. Blanchot, F. Lantoine, J. Neveux and D. Marie (1996). "Vertical structure of  
646 picophytoplankton at different trophic sites of the tropical northeastern Atlantic Ocean." *Deep Sea*  
647 *Research Part I: Oceanographic Research Papers* **43**(8): 1191-1213.

648 Read, R. W., P. M. Berube, S. J. Biller, I. Neveux, A. Cubillos-Ruiz, S. W. Chisholm and J. J. Grzymalski  
649 (2017). "Nitrogen cost minimization is promoted by structural changes in the transcriptome of N-  
650 deprived *Prochlorococcus* cells." *The ISME journal* **11**(10): 2267-2278.

651 Ribalet, F., J. Swalwell, S. Clayton, V. Jiménez, S. Sudek, Y. Lin, Z. I. Johnson, A. Z. Worden and E. V.  
652 Armbrust (2015). "Light-driven synchrony of *Prochlorococcus* growth and mortality in the subtropical  
653 Pacific gyre." *Proceedings of the National Academy of Sciences* **112**(26): 8008-8012.

654 Rocap, G., F. W. Larimer, J. Lamerdin, S. Malfatti, P. Chain, N. A. Ahlgren, A. Arellano, M. Coleman, L.  
655 Hauser, W. R. Hess, Z. I. Johnson, M. Land, D. Lindell, A. F. Post, W. Regala, M. Shah, S. L. Shaw, C.  
656 Steglich, M. B. Sullivan, C. S. Ting, A. Tolonen, E. A. Webb, E. R. Zinser and S. W. Chisholm (2003).

657 "Genome divergence in two *Prochlorococcus* ecotypes reflects oceanic niche differentiation." *Nature*  
658 **424**(6952): 1042-1047.

659 Saito, M. A., M. R. McIlvin, D. M. Moran, T. J. Goepfert, G. R. DiTullio, A. F. Post and C. H. Lamborg  
660 (2014). "Multiple nutrient stresses at intersecting Pacific Ocean biomes detected by protein  
661 biomarkers." *Science* **345**(6201): 1173-1177.

662 Sauer, J., U. Schreiber, R. Schmid, U. Völker and K. Forchhammer (2001). "Nitrogen starvation-induced  
663 chlorosis in *Synechococcus* PCC 7942. Low-level photosynthesis as a mechanism of long-term survival."  
664 *Plant Physiology* **126**(1): 233-243.

665 Sher, D., J. W. Thompson, N. Kashtan, L. Croal and S. W. Chisholm (2011). "Response of *Prochlorococcus*  
666 ecotypes to co-culture with diverse marine bacteria." *ISME J* **5**(7): 1125-1132.

667 Steglich, C., M. Behrenfeld, M. Koblizek, H. Claustre, S. Penno, O. Prasil, F. Partensky and W. R. Hess  
668 (2001). "Nitrogen deprivation strongly affects Photosystem II but not phycoerythrin level in the divinyl-  
669 chlorophyll b-containing cyanobacterium *Prochlorococcus marinus*." *Biochimica et Biophysica Acta (BBA)*  
670 *- Bioenergetics* **1503**(3): 341-349.

671 Sukenik, A., I. Maldener, T. Delhaye, Y. Viner-Mozzini, D. Sela and M. Bormans (2015). "Carbon  
672 assimilation and accumulation of cyanophycin during the development of dormant cells (akinetes) in the  
673 cyanobacterium *Aphanizomenon ovalisporum*." *Frontiers in Microbiology* **6**(1067).

674 Szul, M. J., S. P. Dearth, S. R. Campagna and E. R. Zinser (2019). "Carbon fate and flux in *Prochlorococcus*  
675 under nitrogen limitation." *mSystems* **4**(1): e00254-00218.

676 Tamura, K., G. Stecher, D. Peterson, A. Filipowski and S. Kumar (2013). "MEGA6: Molecular Evolutionary  
677 Genetics Analysis Version 6.0." *Molecular Biology and Evolution* **30**(12): 2725-2729.

678 Thompson, A. W., K. Huang, M. A. Saito and S. W. Chisholm (2011). "Transcriptome response of high-  
679 and low-light-adapted *Prochlorococcus* strains to changing iron availability." *ISME J* **5**(10): 1580-1594.

680 Thompson, A. W., G. van den Engh, N. A. Ahlgren, K. Kouba, S. Ward, S. T. Wilson and D. M. Karl (2018).  
681 "Dynamics of *Prochlorococcus* diversity and photoacclimation during short-term shifts in water column  
682 stratification at station ALOHA." *Frontiers in Marine Science* **5**(488).

683 Ting, C. S., G. Rocap, J. King and S. W. Chisholm (2002). "Cyanobacterial photosynthesis in the oceans:  
684 the origins and significance of divergent light-harvesting strategies." *Trends in Microbiology* **10**(3): 134-  
685 142.

686 Tolonen, A. C., J. Aach, D. Lindell, Z. I. Johnson, T. Rector, R. Steen, G. M. Church and S. W. Chisholm  
687 (2006). "Global gene expression of *Prochlorococcus* ecotypes in response to changes in nitrogen  
688 availability." *Mol Syst Biol* **2**: 53.

689 Van Mooy, B. A., G. Rocap, H. F. Fredricks, C. T. Evans and A. H. Devol (2006). "Sulfolipids dramatically  
690 decrease phosphorus demand by picocyanobacteria in oligotrophic marine environments." *Proc Natl*  
691 *Acad Sci U S A* **103**(23): 8607-8612.

692 Vaulot, D., D. Marie, R. J. Olson and S. W. Chisholm (1995). "Growth of *Prochlorococcus*, a  
693 photosynthetic prokaryote, in the equatorial Pacific Ocean." *Science* **268**(5216): 1480-1482.

694 Vila-Costa, M., R. Simó, H. Harada, J. M. Gasol, D. Slezak and R. P. Kiene (2006).  
695 "Dimethylsulfoniopropionate Uptake by Marine Phytoplankton." *Science* **314**(5799): 652-654.

696 Voigt, K., C. M. Sharma, J. Mitschke, S. Joke Lambrecht, B. Vos, W. R. Hess and C. Steglich (2014).  
697 "Comparative transcriptomics of two environmentally relevant cyanobacteria reveals unexpected  
698 transcriptome diversity." *ISME J* **8**(10): 2056-2068.

699 Yelton, A. P., S. G. Acinas, S. Sunagawa, P. Bork, C. Pedrós-Alió and S. W. Chisholm (2016). "Global  
700 genetic capacity for mixotrophy in marine picocyanobacteria." *The ISME Journal* **10**: 2946.

701 Yooseph, S., K. H. Nealson, D. B. Rusch, J. P. McCrow, C. L. Dupont, M. Kim, J. Johnson, R. Montgomery,  
702 S. Ferriera, K. Beeson, S. J. Williamson, A. Tovchigrechko, A. E. Allen, L. A. Zeigler, G. Sutton, E.  
703 Eisenstadt, Y.-H. Rogers, R. Friedman, M. Frazier and J. C. Venter (2010). "Genomic and functional  
704 adaptation in surface ocean planktonic prokaryotes." *Nature* **468**: 60.



705 Zubkov, M. V., G. A. Tarran and B. M. Fuchs (2004). "Depth related amino acid uptake by  
706 *Prochlorococcus cyanobacteria* in the Southern Atlantic tropical gyre." *Fems Microbiology Ecology* **50**(3):  
707 153-161.

708

709

710

711

712

713

714

715

716

717

718

719

720

721

722

723

724

725 **Supplementary data**

726 ***Prochlorococcus* rely on microbial interactions rather than on chlorotic resting stages to**  
727 **survive long-term stress**

728

729 Dalit Roth-Rosenberg<sup>1#</sup>, Dikla Aharonovich<sup>1#</sup>, Tal Luzzatto-Knaan<sup>1#</sup>, Angela Vogts<sup>2</sup>, Luca Zoccarato<sup>3</sup>, Falk  
730 Eigemann<sup>2</sup>, Noam Nago<sup>1</sup>, Hans-Peter Grossart<sup>3,4</sup>, Maren Voss<sup>2</sup> and Daniel Sher <sup>\*1</sup>

731 <sup>1</sup> Department of Marine Biology, Leon H. Charney School of Marine Sciences, University of Haifa, 31905,  
732 Israel; <sup>2</sup> Leibniz-Institute for Baltic Sea Research, Seestrasse15, D-18119 Warnemuende, Germany; <sup>3</sup>  
733 Department of Experimental Limnology, Leibniz-Institute of Freshwater Ecology and Inland Fisheries,  
734 Alte Fischerhuetten 2, D-16775 Stechlin, Germany; <sup>4</sup>Potsdam University, Institute of Biochemistry and  
735 Biology, Maulbeerallee 2, D-14469 Potsdam, Germany

736 \* Corresponding author: [dsher@univ.haifa.ac.il](mailto:dsher@univ.haifa.ac.il)

737 # These authors contributed equally to this study

738

739

740 **Supplementary text**

741 **Can mis-sorted cells explain the presence of non-active cells in the high-fl population, and of**  
742 **active cells in the low- and mid-fl populations?**

743 FACS-sorting high-, mid- and low-fl populations from *Prochlorococcus* cultures resulted in  
744 samples that are highly enriched in the sorted populations. However, the sorted populations  
745 are not completely pure, with some incorrectly sorted cells observed when the sorted  
746 populations were re-analyzed by flow cytometry (e.g. mid- or low-fl cells in the sorted high-fl  
747 population, Supplementary Table 1). These incorrectly sorted cells could affect the  
748 interpretation of the single-cell uptake rates, for example, the presence of inactive cells in the  
749 high-fl population could be interpreted either as a real biological phenomenon (cells with high  
750 autofluorescence that are nevertheless inactive) or as the result of incorrectly sorted cells  
751 belonging to the mid- or low-fl populations (assuming the mid- and low-fl cells are inactive). To  
752 test this hypothesis, we first determined, for each cell in the NanoSIMS analysis, whether it was

753 active or inactive, defining inactive cells as those with C and N uptake rates in the range of the  
754 control, i.e. glutaraldehyde killed cells (Supplementary Table 2, Killed cells  $C_{\max} = 0.765$   
755 fg/cell/day and  $N_{\max} = 0.215$  fg/cell/day). We then compared the observed number of active  
756 cells to the expected number of active cells, based on the number of high-, mid- and low-fl cells  
757 after FACS sorting, and assuming only the high-fl cells are active. For the datasets shown in  
758 Figure 2 and Supplementary Figure 3, the hypothesis that the number of active cells could be  
759 explained by the number of high-fl cells after sorting was rejected ( $X^2$  test,  $DF=2$ ,  $p<0.01$ ,  
760  $X^2=24.4$  and  $n=236$  cells for Figure 2,  $X^2=336.1$  and  $n=415$  cells for Supplementary Figure 3).  
761 There were fewer active cells in the high-fl populations than expected (68% and 64% active cells  
762 Supplementary Tables 2, compared to 94% and 84.5% high-fl cells, respectively, in the high-fl  
763 subpopulation Supplementary Tables 1), suggesting that some high-fl cells are inactive.  
764 Conversely, there were more active cells than expected in the mid- and low-fl populations (22%  
765 and 51% active cells Supplementary Tables 2, compared to 7.9% and 7.5% high-fl cells,  
766 respectively, in the high-fl subpopulation Supplementary Tables 1), suggesting that some cells in  
767 these populations can be active.

768

### 769 **Estimating the fraction of *Prochlorococcus* cells living mixotrophically**

770 A rough estimate of the fraction of *Prochlorococcus* cells living mixotrophically can be obtained  
771 by determining how many cells are found under conditions where the light intensity is not  
772 sufficient to support active growth. We used the experimentally-determined minimal light  
773 requirement for active growth of high-light and low-light adapted strains in the lab (10  $\mu E$  and  
774 2.8  $\mu E$  during a 14:10 day-night cycle for HL and LL strains, respectively) in the lab (Moore and  
775 Chisholm 1999), converting these to integrated daily PAR levels (in mole quanta  $m^{-2} day^{-1}$ ,  
776 eMIT9313 is treated as a LL strain in this analysis despite the limited light levels analyzed for the  
777 MIT9313 strain). The threshold light levels based on this calculation were 0.50 mol Q  $day^{-1}$  for  
778 HL strains and 0.18 mol Q  $day^{-1}$  for LL strains. We then determined the number of  
779 *Prochlorococcus* cells found at depths where the integrated daily PAR is lower than the minimal  
780 light requirement (i.e. below the photic depth for *Prochlorococcus*). For this analysis, we used

781 the qPCR estimates of the cell abundance of each ecotype from a 5-year time series of the  
 782 *Prochlorococcus* ecotypes at the Hawaii and Bermuda time series study sites (HOT and BATS,  
 783 (Malmstrom et al. 2010)). In our analysis, however, we consider only the time of the year when  
 784 the water column is stratified (defined here as a mixed layer depth that is shallower than the HL  
 785 *Prochlorococcus* photic depth), because at other times cells below the photic depth but still  
 786 within the upper mixed layer could be mixed closer to the surface and therefore receive  
 787 sufficient light. During these times, the estimated photic depth for HL ecotypes was between  
 788 83-114m at HOT and 81-110m at BATS, and for LL ecotypes between 101-140m at HOT and  
 789 103-135m at BATS. An average of ~8-10% of the *Prochlorococcus* cells at HOT and BATS,  
 790 respectively, are found below these depths (range ~1.4-37.5% at HOT and ~0.5-43% at BATS),  
 791 including most of the LL cells (Supplementary Figure 7). Multiple studies have shown that  
 792 *Prochlorococcus* cells undergo division at these depths (growth rates of 0.1-0.2 day have been  
 793 recorded down to depths of 150m; e.g. (Vaulot et al. 1995, Binder et al. 1996, Liu et al. 1997)),  
 794 and thus at least some cells observed at these depths are not quiescent or dead. Future studies  
 795 are needed in order to better constrain these rough estimates of the percent of mixotrophic  
 796 *Prochlorococcus*, taking into account processes leading to mixing of cells below the mixed layer  
 797 (e.g. internal waves) and also accounting for other *Prochlorococcus* ecotypes not analyzed here.

798 **Supplementary Table 1: Cell counts and purity of the sorted cells**

|                                           |                    | Sorted sub-populations<br>*MIT9313 old |                 |               | Sorted sub-populations<br>**MIT9313 old |               |                 |
|-------------------------------------------|--------------------|----------------------------------------|-----------------|---------------|-----------------------------------------|---------------|-----------------|
|                                           |                    | High                                   | Mid             | Low           | High                                    | Mid           | Low             |
| % Purity and<br>number of<br>sorted cells | High               | 3388<br>(94%)                          | 239<br>(7.9%)   | 19<br>(1%)    | 3109<br>(84.5%)                         | 301<br>(7.5%) | 100<br>(2.9%)   |
|                                           | Mid                | 174<br>(4.8%)                          | 2673<br>(88.2%) | 172<br>(9.1%) | 514<br>(14%)                            | 3639<br>(91%) | 685<br>(19.6%)  |
|                                           | Low                | 59<br>(1.6%)                           | 118<br>(3.9%)   | 1699<br>(90%) | 56<br>(1.5%)                            | 57<br>(1.4%)  | 2715<br>(77.6%) |
|                                           | <b>Total cells</b> | <b>3621</b>                            | <b>3030</b>     | <b>1890</b>   | <b>3621</b>                             | <b>3030</b>   | <b>1890</b>     |

799 \*The result refers to the experiment presented in Fig. 2

800 \*\* The result refers to the experiment presented in Supplementary Fig. 3

801

802

803

804

805 **Supplementary Table 2: Number of active and inactive cells in each of the sorted sub-populations.**

|                                       | Sorted sub-populations<br>*MIT9313 old |             |             | Sorted sub-populations<br>**MIT9313 old |              |             |
|---------------------------------------|----------------------------------------|-------------|-------------|-----------------------------------------|--------------|-------------|
|                                       | High                                   | Mid         | Low         | High                                    | Mid          | Low         |
| <b>% and number of active cells</b>   | 45<br>(68%)                            | 16<br>(22%) | 3<br>(3.1%) | 75<br>(64%)                             | 107<br>(51%) | 5<br>(6%)   |
| <b>% and number of inactive cells</b> | 21<br>(31.8%)                          | 57<br>(78%) | 94<br>(97%) | 43<br>(36%)                             | 101<br>(49%) | 83<br>(94%) |
| <b>Total cells</b>                    | 66                                     | 73          | 97          | 118                                     | 208          | 88          |

806 \*The result refers to the experiment presented in Fig. 2

807 \*\* The result refers to the experiment presented in Supplementary Fig. 3

808

809 **Supplementary Table 3: Coefficient of variation**

| Strain and growth stage      | Sub-population | Illumination                                                | Number of cells | C <sub>cov</sub> | N <sub>cov</sub> |
|------------------------------|----------------|-------------------------------------------------------------|-----------------|------------------|------------------|
| <b>Batch culture</b>         |                |                                                             |                 |                  |                  |
| MIT9313, exponential growth* | High           | Constant light<br>27 $\mu$ E                                | 158             | 0.92             | 0.89             |
| MIT9313, old culture**       | High           |                                                             | 66              | 1.08-1.29        | 0.92-0.87        |
|                              | Mid            |                                                             | 73              | 2.19-2.37        | 1.63-1.09        |
|                              | Low            |                                                             | 97              | 3.77-7.11        | 1.83-0.85        |
| MIT9313, old culture***      | High           | Photo-period<br>12:12 L/D, 27 $\mu$ E                       | 86              | 2.65             | 1.02             |
|                              | Mid            |                                                             | 171             | 5.15             | 0.99             |
|                              | Low            |                                                             | 73              | 0.69             | 2.33             |
| <b>Natural samples</b>       |                |                                                             |                 |                  |                  |
| 115m                         | High           | Natural cycle<br>approximately<br>14:10 L/D,<br>2-5 $\mu$ E | 55              | 0.73             | 0.16             |
| 115m                         | Low            |                                                             | 45              | 0.61             | 0.33             |
| 125m                         | High           |                                                             | 49              | 0.58             | 0.17             |
| <b>Killed cells</b>          |                |                                                             | 114             | 2.63             | 0.09             |

810 \*The results for MIT9313 exponential growth refer to the experiment presented in Supplementary Fig.

811 5.

812 \*\*The results for old MIT9313 cultures under constant light refer to the two experiments presented in  
813 Fig. 2 and Supplementary Fig. 3.

814 \*\*\* The results for Old MIT9313 cultures under L/D refer to the experiment presented in Supplementary  
815 Fig. 4.

816

## 817 Supplementary figures

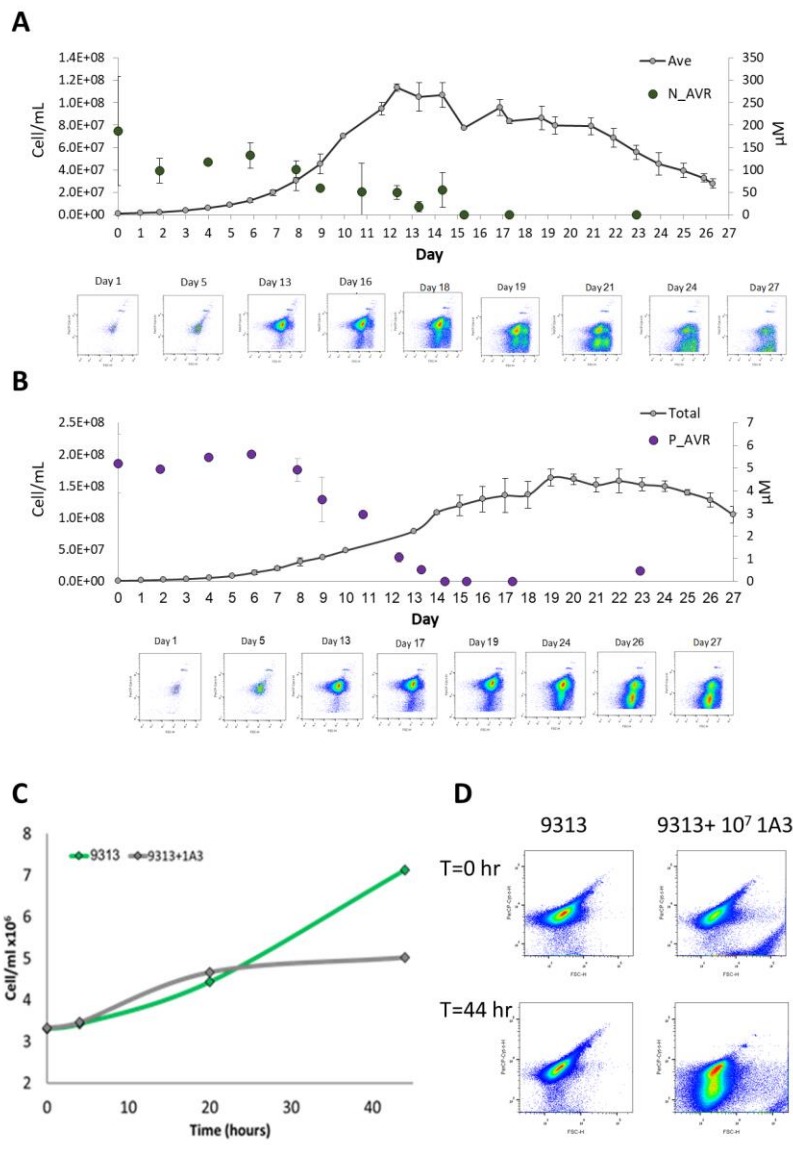

818

819 **Supplementary Figure 1:** Sub-populations of low-chl cells emerge in *Prochlorococcus* cultures under N  
820 and P starvation, and when inhibited by heterotrophic bacteria. A, B) Batch cultures of strain MIT9312

821 grown under conditions where stationary phase is induced by N and P starvation (panels A and B,  
822 respectively). The data shown are from (Grossowicz et al. 2017). C) Batch cultures of *Prochlorococcus*  
823 MIT9313 grown axenically and in co-culture with a heterotrophic bacterium, *Alteromonas* HOT1A3. D)  
824 FCM of *Prochlorococcus* populations at two time points ('0' and '44' hours). Data are from Aharonovich  
825 and Sher (Aharonovich and Sher 2016).

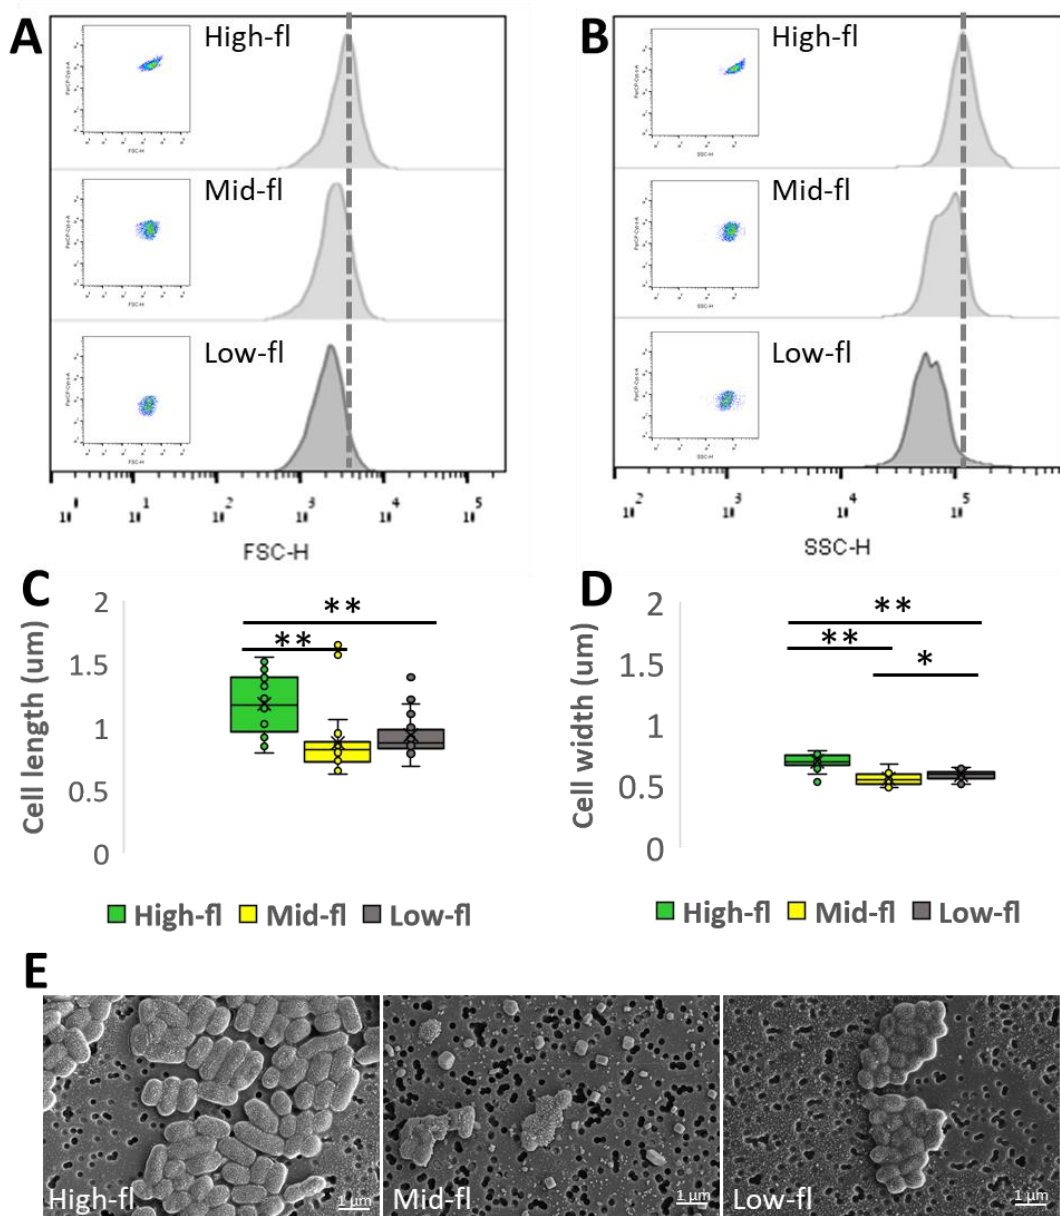

826

827 **Supplementary Figure 2: Sorted cells belonging to different sub-populations of *Prochlorococcus***  
828 **MIT9313 vary in size.** A late-exponential phase MIT9313 culture was fixed using glutaraldehyde,

829 analyzed using flow cytometry, and the three different sub-populations sorted and observed by SEM. A,  
830 B) Histograms representing changes in cell size (Forward scatter, FSC, panel A) and complexity (Side  
831 Scatter, SSC, panel B) as measured by flow cytometry. Boxplots of variations in cell length (C) and cell  
832 width (D) as measured from SEM images of sorted populations. High-fl (n=27), Mid-fl (n=23), Low-fl  
833 (n=24). The three subpopulations were statistically different (Kruskal-Wallis test,  $p < 0.001$ ). Significant  
834 differences between each of the two populations (Mann-Whitney U test) are shown (\*\* -  $p < 0.001$ , \* -  
835  $p < 0.05$ ). Lengths values from Mid and Low were not significantly different. E) SEM image of sorted sub-  
836 populations, scale bar is 1 $\mu$ m. The small square objects in the middle panel are salt crystals.

837



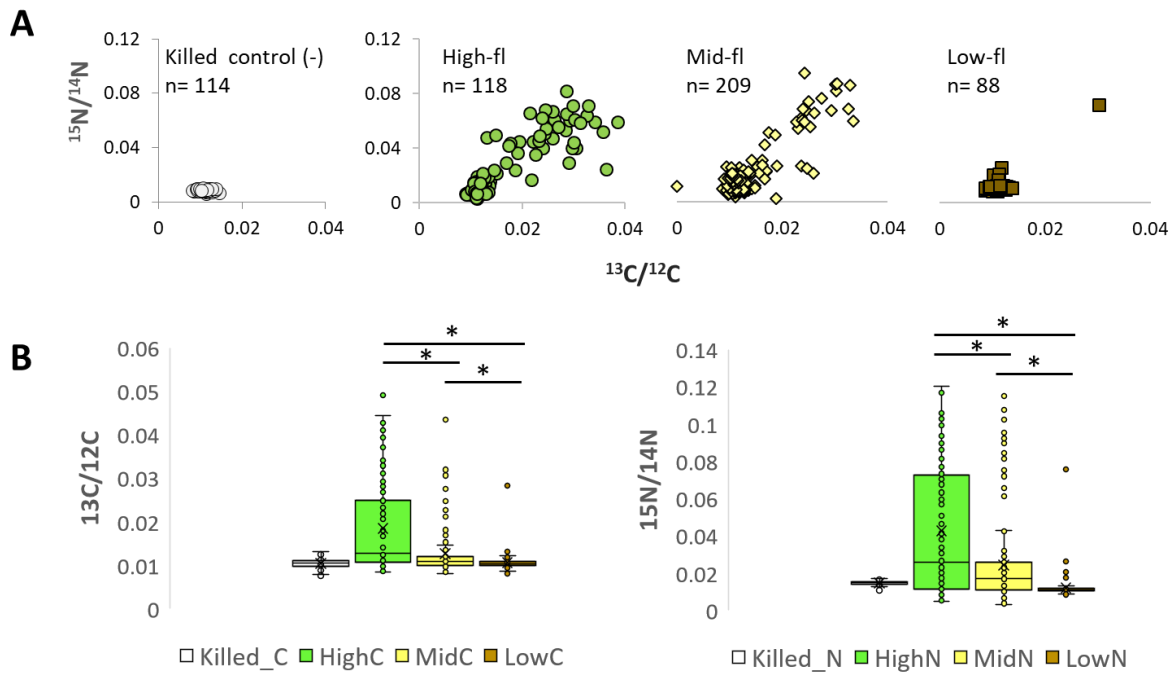

838

839

840 **Supplementary Figure 3. An independent experiment confirming differences in the metabolic activity**  
841 **of sorted sub-populations of MIT9313 by NanoSIMS.** *Prochlorococcus* MIT9313 cultures were grown for  
842 44 days in Pro99 and labeled with  $\text{H}^{13}\text{CO}_3^-$  and  $^{15}\text{NH}_4^+$  for 18h. (A) Scatterplot of  $^{13}\text{C}/^{12}\text{C}$  and  $^{15}\text{N}/^{14}\text{N}$  ratios  
843 obtained from NanoSIMS analysis of each subpopulation (indicating the number of events detected  
844 from multiple fields). (B) Boxplot represent the variances of  $^{13}\text{C}/^{12}\text{C}$  and  $^{15}\text{N}/^{14}\text{N}$  in each sub-population.

845 The three populations were statistically different (Kruskal-Wallis test,  $p < 0.001$ , asterisks show significant  
846 differences in comparisons between each of the two populations using the Mann-Whitney U test,  
847  $p < 0.001$ ).

848

849

850

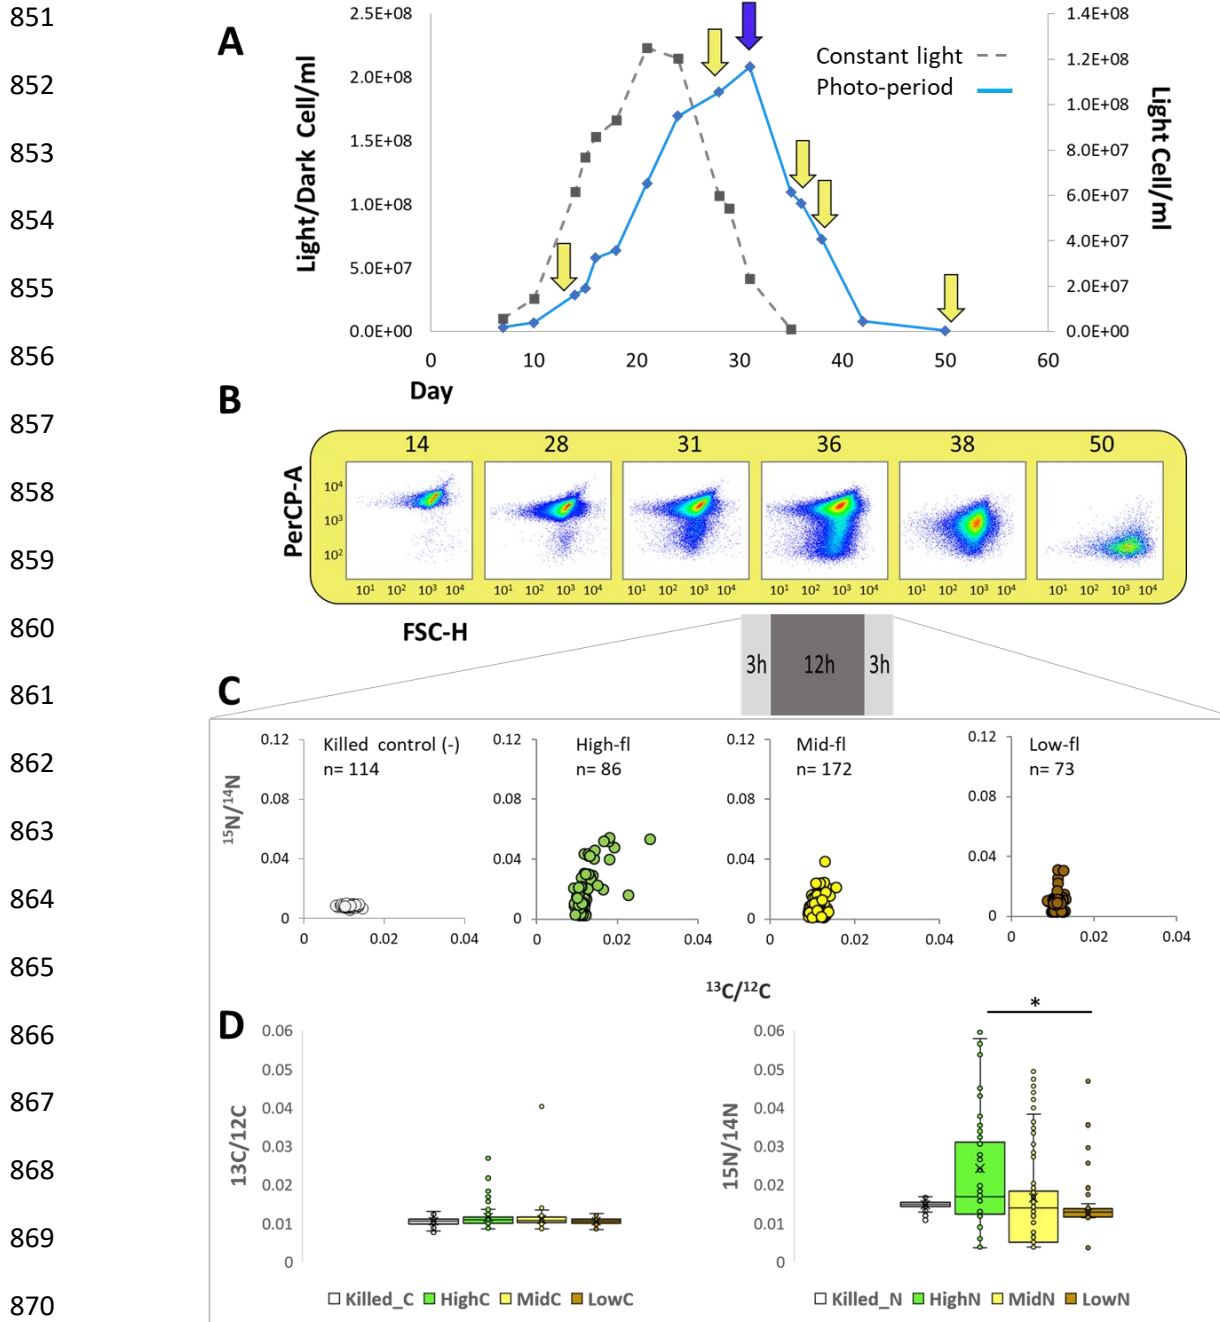

871 **Supplementary Figure 4. NanoSIMS analysis for metabolic activity of *Prochlorococcus* chlorotic sub-**  
 872 **populations under light/dark growth conditions.** For *Prochlorococcus*, cell physiology is strongly  
 873 entrained by the diel cycle, with cells typically replicating early during the night (Zinser et al. 2009). As  
 874 the cultures grown for these experiments presented in Figure 2 and Supplementary Fig 3 were grown  
 875 under conditions of constant light, it was possible that heterogeneity in C and N uptake rates was due to  
 876 the presence of cells at different cell cycle stages. To test this hypothesis, we repeated this experiment  
 877 using an MIT9313 culture grown under 12:12 light/dark conditions. The C uptake rate, as well as the cell-

878 cell heterogeneity, were lower under these conditions, potentially because the cells were in darkness for  
879 12 out of the 18 hours of labeling, including the “evening” and “morning” periods when the cell’s  
880 photosynthetic machinery is not running at its maximal capacity (Zinser et al. 2009). In contrast, the N  
881 uptake rate remained high under the light-dark cycle. This suggests that  $\text{NH}_4$  uptake in *Prochlorococcus*  
882 is decoupled from photosynthesis and occurs during both light and dark periods, unlike amino acid  
883 uptake which occurs in *Prochlorococcus* primarily during the day (Mary et al. 2008). A) MIT9313 growth  
884 curve under 12 h light and 12 h dark (The arrows mark the days shown in panel B.) B) A time series of  
885 flow cytometry scattergrams from the tested MIT9313 culture. The x-axis is Forward Scatter (FSC, a  
886 proxy for cell size), the y-axis is the chlorophyll autofluorescence of the cells. The appearance of  
887 chlorotic sub-population observed from the late exponential phase (Day 31). C) Scatterplot of  $^{13}\text{C}/^{12}\text{C}$   
888 and  $^{15}\text{N}/^{14}\text{N}$  ratios obtained from NanoSIMS analysis following 18 h incubation 3h L/12h D/3h L on day  
889 36. D) Boxplot of  $^{13}\text{C}/^{12}\text{C}$  and  $^{15}\text{N}/^{14}\text{N}$  enrichment in each subpopulation. Glutaraldehyde killed cells used  
890 as a negative control. Lines represent the median, X represents the mean, box borders are 1<sup>st</sup> quartiles  
891 and whiskers represent the full range. The three populations were statistically different for N uptake  
892 (Kruskal-Wallis test,  $p < 0.001$ ) but not for C uptake ( $p = 0.06$ ). Significant differences between each two  
893 populations (Mann-Whitney U test) are shown (\* -  $p < 0.001$ ).

894

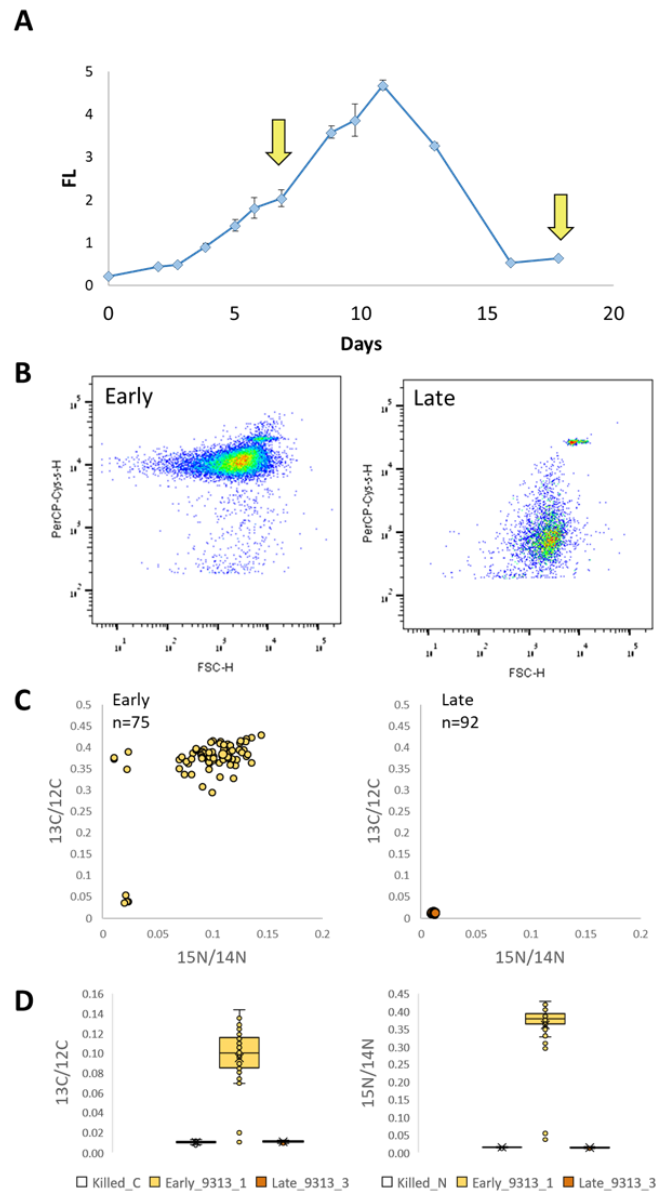

895

896

897

898

899 **Supplementary Figure 5. NanoSIMS analysis of *Prochlorococcus* MIT9313 from exponentially-growing,**  
900 **nutrient-replete cultures compared to late, post-decline stage in batch culture. We measured the N**

901 and C uptake rates in MIT9313 cultures for which the stationary stage is induced by N starvation (low-N  
902 Pro99, N:P ratio = 2, (Grossowicz et al. 2017)). A) Growth curve monitored via the chlorophyll auto-  
903 fluorescence. Arrows indicate the heavy-nutrient labeling time points (days 7 and 18). B) FCM  
904 scatterplots of populations of 24hr post labelling. C) Scatterplot of  $^{13}\text{C}/^{12}\text{C}$  and  $^{15}\text{N}/^{14}\text{N}$  ratios obtained  
905 from NanoSIMS analysis, representing single cell uptake. D) Boxplot of  $^{13}\text{C}/^{12}\text{C}$  and  $^{15}\text{N}/^{14}\text{N}$  enrichment in  
906 each population, compared to killed cells in the control.

907

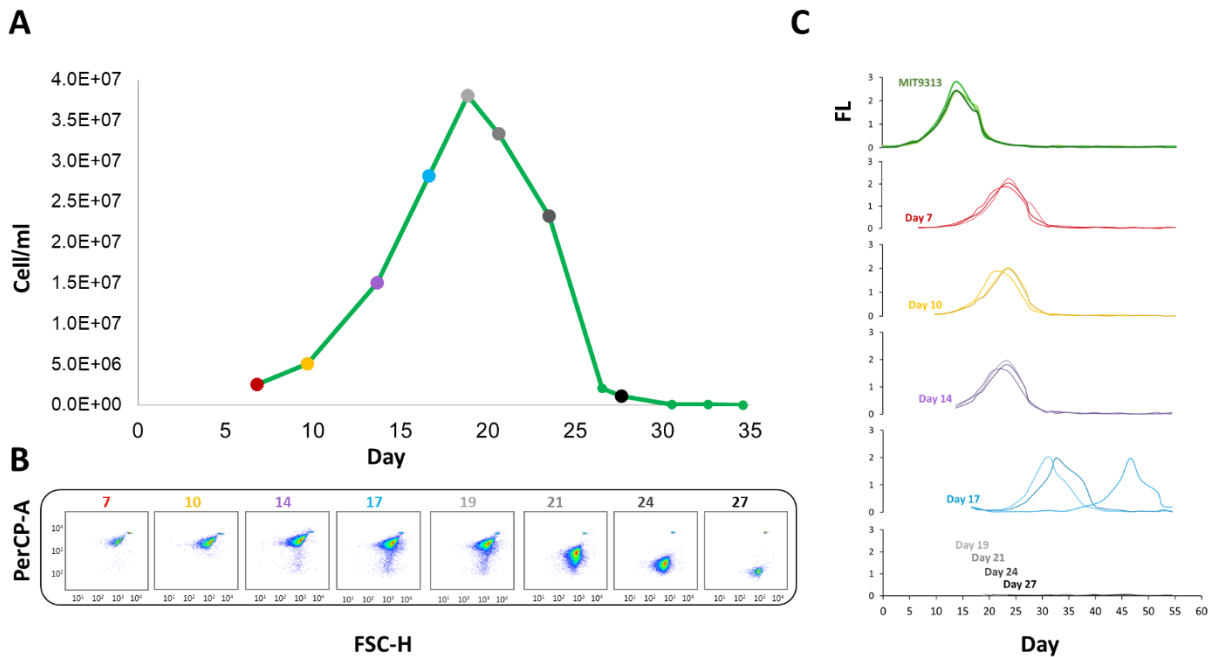

908 **Supplementary Figure 6: Time-dependent changes in viability of cells transferred into fresh media at**  
909 **different life cycle stages of a batch culture. A)** A growth curve of a MIT9313 culture, under conditions  
910 where stationary stage is induced by nitrogen starvation (2:1 N/P ratio in the growth media, (Grossowicz  
911 et al. 2017)). Colored circles indicate the times point at which triplicate 1ml samples were transferred  
912 into fresh media. B) Flow cytometry scatterplots of the culture shown in panel A. Note that, under  
913 nitrogen starvation, the cultures shift rapidly from being comprised primarily of high-fl cells (day 17,  
914 early stationary phase) to mainly mid-fl cells, with essentially no high-fl cells (day 21). C) Growth curves  
915 of cells being transferred at different times to new, nutrient-replete media (assessed via bulk culture  
916 fluorescence). Cells could not re-grow when transferred after more than 17 days of nitrogen starvation  
917 suggesting that not all high-fl cells are viable, and that low-fl cells are non-viable. Similar results were  
918 observed in MIT9313 cultures grown in Pro99 media, where lag phase is longer and mid-fl cells are also  
919 observed (Figure 3).

920

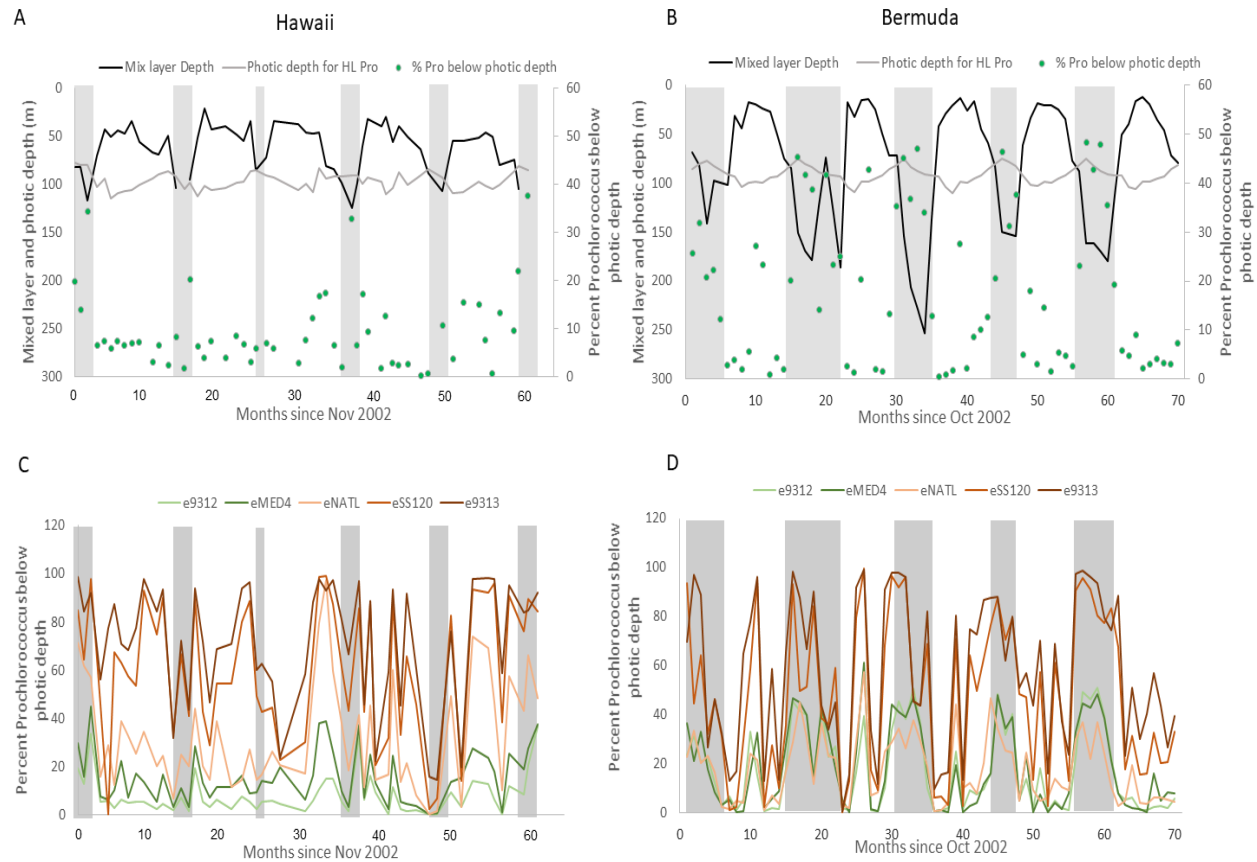

921

922 **Supplementary figure 7: Estimating the number of *Prochlorococcus* cells found below their photic zone**

923 **at Hawaii and Bermuda.** A, B) The percent of total *Prochlorococcus* cells found below their photic zone

924 at Hawaii (A) and Bermuda (B), defined as the integrated illumination level supporting the growth of

925 representative strains in laboratory cultures (Moore and Chisholm 1999) (grey line shows this depth for

926 HL strains). The black line shows the mixed layer depth (MLD), the grey areas are non-stratified

927 conditions where cells may be mixed from depth to the surface. C, D) The percentage of each

928 *Prochlorococcus* ecotype below its photic depth. For more information see supplementary text. The

929 data are taken from (Malmstrom et al. 2010).

930

931

932

933  
934  
935  
936  
937  
938  
939  
940  
941  
942  
943  
944  
945  
946  
947  
948  
949  
950

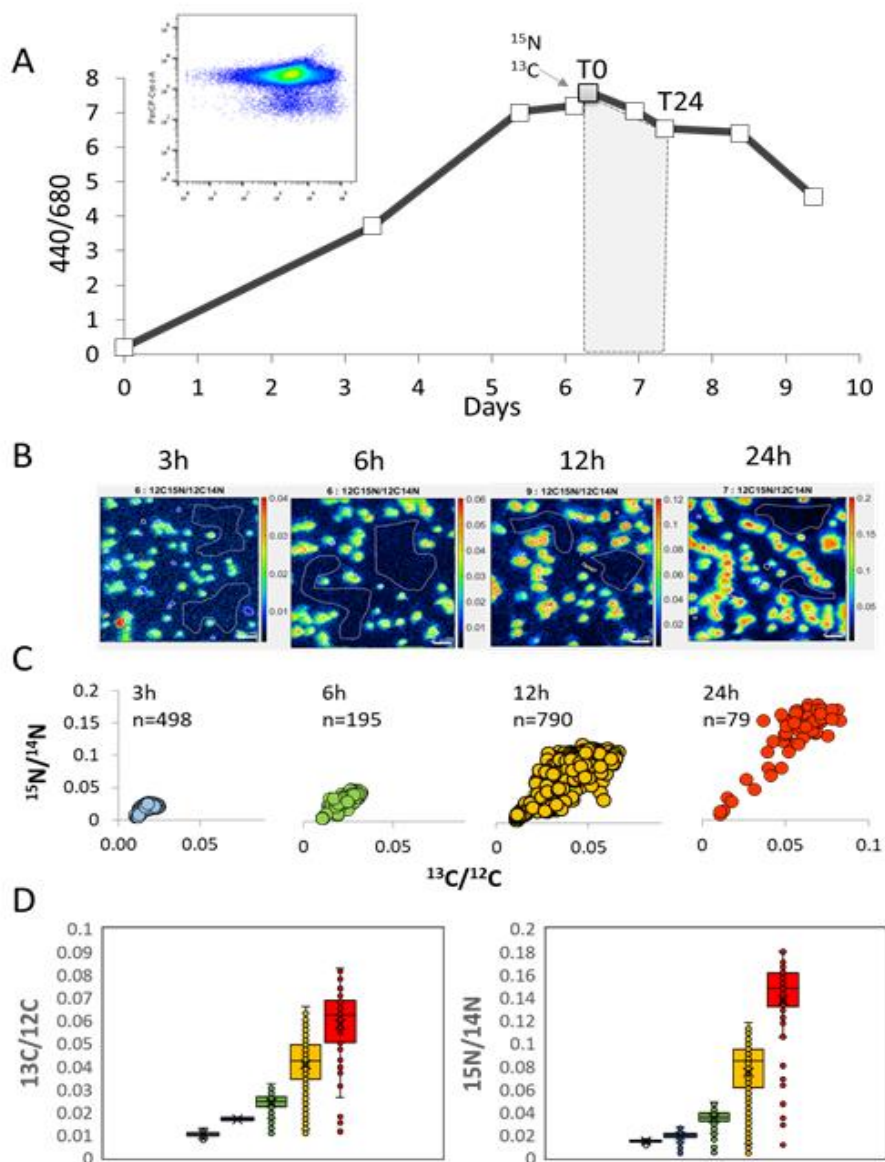

951 **Supplementary Figure 8: Optimization for measuring metabolic activity of *Prochlorococcus* by**  
952 **NanoSIMS** A) Growth curve of *Prochlorococcus* MED4 measured by fluorescence 440/680nm. Labeled  
953 nutrients ( $\text{H}^{13}\text{CO}_3^-$  and  $^{15}\text{NH}_4^+$ ) were added after day 6 and sampled for NanoSIMS at 3h, 6h, 12h, and  
954 24h. Insert shows the cell population at the time of labeling (T0) by FCM. B) NanoSIMS images of  
955  $^{15}\text{N}/^{12}\text{C}$  analysis of cell for measuring metabolic activity. C) Scatterplot of  $^{13}\text{C}/^{12}\text{C}$  and  $^{15}\text{N}/^{14}\text{N}$  ratios  
956 obtained from NanoSIMS analysis at each time point (indicating the number of events detected from  
957 multiple fields). D) Boxplots represent the variances of  $^{13}\text{C}/^{12}\text{C}$  and  $^{15}\text{N}/^{14}\text{N}$  at each time point.

958



959 **References for supplementary information**

- 960 Aharonovich, D. and D. Sher (2016). "Transcriptional response of Prochlorococcus to co-culture with a  
961 marine Alteromonas: differences between strains and the involvement of putative infochemicals." ISME  
962 J **10**(12): 2892-2906.
- 963 Binder, B. J., S. W. Chisholm, R. J. Olson, S. L. Frankel and A. Z. Worden (1996). "Dynamics of  
964 picophytoplankton, ultraphytoplankton and bacteria in the central equatorial Pacific." Deep Sea  
965 Research Part II: Topical Studies in Oceanography **43**(4): 907-931.
- 966 Grossowicz, M., G. M. Marques and G. A. K. van Voorn (2017). "A dynamic energy budget (DEB) model to  
967 describe population dynamics of the marine cyanobacterium Prochlorococcus marinus." Ecological  
968 Modelling **359**: 320-332.
- 969 Grossowicz, M., D. Roth-Rosenberg, D. Aharonovich, J. Silverman, M. J. Follows and D. Sher (2017).  
970 "Prochlorococcus in the lab and in silico: The importance of representing exudation." Limnology and  
971 Oceanography **62**(2): 818-835.
- 972 Liu, H., H. A. Nolla and L. Campbell (1997). "Prochlorococcus growth rate and contribution to primary  
973 production in the equatorial and subtropical North Pacific Ocean." Aquatic Microbial Ecology **12**(1): 39-  
974 47.
- 975 Malmstrom, R. R., A. Coe, G. C. Kettler, A. C. Martiny, J. Frias-Lopez, E. R. Zinser and S. W. Chisholm  
976 (2010). "Temporal dynamics of Prochlorococcus ecotypes in the Atlantic and Pacific oceans." ISME J.  
977 Moore, L. R. and S. W. Chisholm (1999). "Photophysiology of the marine cyanobacterium  
978 Prochlorococcus: Ecotypic differences among cultured isolates." Limnology and Oceanography **44**(3):  
979 628-638.
- 980 Vaultot, D., D. Marie, R. J. Olson and S. W. Chisholm (1995). "Growth of prochlorococcus, a  
981 photosynthetic prokaryote, in the equatorial Pacific ocean." Science **268**(5216): 1480-1482.
- 982 Zinser, E. R., D. Lindell, Z. I. Johnson, M. E. Futschik, C. Steglich, M. L. Coleman, M. A. Wright, T. Rector, R.  
983 Steen, N. McNulty, L. R. Thompson and S. W. Chisholm (2009). "Choreography of the transcriptome,  
984 photophysiology, and cell cycle of a minimal photoautotroph, prochlorococcus." PLoS ONE **4**(4): e5135.
- 985 Agusti, S. and M. C. Sanchez (2002). "Cell viability in natural phytoplankton communities quantified by a  
986 membrane permeability probe." Limnology and Oceanography **47**(3): 818-828.
- 987 Aharonovich, D. and D. Sher (2016). "Transcriptional response of Prochlorococcus to co-culture with a  
988 marine Alteromonas: differences between strains and the involvement of putative infochemicals." ISME  
989 J **10**(12): 2892-2906.
- 990 Bergkessel, M., D. W. Basta and D. K. Newman (2016). "The physiology of growth arrest: uniting  
991 molecular and environmental microbiology." Nature Reviews Microbiology **14**: 549.
- 992 Berthelot, H., S. Duhamel, S. L'Helguen, J.-F. Maguer, S. Wang, I. Cetinić and N. Cassar (2018).  
993 "NanoSIMS single cell analyses reveal the contrasting nitrogen sources for small phytoplankton." The  
994 ISME Journal.
- 995 Binder, B. J., S. W. Chisholm, R. J. Olson, S. L. Frankel and A. Z. Worden (1996). "Dynamics of  
996 picophytoplankton, ultraphytoplankton and bacteria in the central equatorial Pacific." Deep Sea  
997 Research Part II: Topical Studies in Oceanography **43**(4): 907-931.
- 998 Gao, D., X. Huang and Y. Tao (2016). "A critical review of NanoSIMS in analysis of microbial metabolic  
999 activities at single-cell level." Critical Reviews in Biotechnology **36**(5): 884-890.
- 1000 Gilbert, J. D. J. and W. F. Fagan (2011). "Contrasting mechanisms of proteomic nitrogen thrift in  
1001 Prochlorococcus." Molecular Ecology **20**(1): 92-104.

- 1002 Goericke, R. and N. A. Welschmeyer (1993). "The marine prochlorophyte *Prochlorococcus* contributes  
1003 significantly to phytoplankton biomass and primary production in the Sargasso Sea." Deep Sea Research  
1004 Part I: Oceanographic Research Papers **40**(11): 2283-2294.
- 1005 Hughes, C., D. J. Franklin and G. Malin (2011). "Iodomethane production by two important marine  
1006 cyanobacteria: *Prochlorococcus marinus* (CCMP 2389) and *Synechococcus* sp. (CCMP 2370)." Marine  
1007 Chemistry **125**(1-4): 19-25.
- 1008 Legendre, L. and M. Gosselin (1997). "Estimation of N or C uptake rates by phytoplankton using 15N or  
1009 13C: revisiting the usual computation formulae." Journal of Plankton Research **19**(2): 263-271.
- 1010 Lennon, J. T. and S. E. Jones (2011). "Microbial seed banks: the ecological and evolutionary implications  
1011 of dormancy." Nature Reviews Microbiology **9**(2): 119-130.
- 1012 Llabrés, M., S. Agustí and G. J. Herndl (2011). "DIEL IN SITU PICOPHYTOPLANKTON CELL DEATH CYCLES  
1013 COUPLED WITH CELL DIVISION1." Journal of Phycology **47**(6): 1247-1257.
- 1014 Moore, C. M., M. M. Mills, K. R. Arrigo, I. Berman-Frank, L. Bopp, P. W. Boyd, E. D. Galbraith, R. J. Geider,  
1015 C. Guieu, S. L. Jaccard, T. D. Jickells, J. La Roche, T. M. Lenton, N. M. Mahowald, E. Maranon, I. Marinov,  
1016 J. K. Moore, T. Nakatsuka, A. Oschlies, M. A. Saito, T. F. Thingstad, A. Tsuda and O. Ulloa (2013).  
1017 "Processes and patterns of oceanic nutrient limitation." Nature Geoscience **6**(9): 701-710.
- 1018 Moore, L. R. and S. W. Chisholm (1999). "Photophysiology of the marine cyanobacterium  
1019 *Prochlorococcus*: Ecotypic differences among cultured isolates." Limnology and Oceanography **44**(3):  
1020 628-638.
- 1021 Morris, J. J., R. Kirkegaard, M. J. Szul, Z. I. Johnson and E. R. Zinser (2008). "Facilitation of robust growth  
1022 of *Prochlorococcus* colonies and dilute liquid cultures by "helper" heterotrophic bacteria." Appl Environ  
1023 Microbiol **74**(14): 4530-4534.
- 1024 Muñoz-Marín, M. D. C., G. Gómez-Baena, J. Díez, R. J. Beynon, D. González-Ballester, M. V. Zubkov and J.  
1025 M. García-Fernández (2017). "Glucose Uptake in *Prochlorococcus*: Diversity of Kinetics and Effects on  
1026 the Metabolism." Frontiers in microbiology **8**: 327-327.
- 1027 Muñoz-Marín, M. d. C., I. Luque, M. V. Zubkov, P. G. Hill, J. Diez and J. M. García-Fernández (2013).  
1028 "*Prochlorococcus* can use the Pro1404 transporter to take up glucose at nanomolar concentrations in  
1029 the Atlantic Ocean." Proceedings of the National Academy of Sciences **110**(21): 8597-8602.
- 1030 Partensky, F., J. Blanchot, F. Lantoiné, J. Neveux and D. Marie (1996). "Vertical structure of  
1031 picophytoplankton at different trophic sites of the tropical northeastern Atlantic Ocean." Deep Sea  
1032 Research Part I: Oceanographic Research Papers **43**(8): 1191-1213.
- 1033 Read, R. W., P. M. Berube, S. J. Biller, I. Neveux, A. Cubillos-Ruiz, S. W. Chisholm and J. J. Grzymiski  
1034 (2017). "Nitrogen cost minimization is promoted by structural changes in the transcriptome of N-  
1035 deprived *Prochlorococcus* cells." The ISME journal **11**(10): 2267-2278.
- 1036 Ribalet, F., J. Swalwell, S. Clayton, V. Jiménez, S. Sudek, Y. Lin, Z. I. Johnson, A. Z. Worden and E. V.  
1037 Armbrust (2015). "Light-driven synchrony of *Prochlorococcus* growth and mortality in the subtropical  
1038 Pacific gyre." Proceedings of the National Academy of Sciences **112**(26): 8008-8012.
- 1039 Saito, M. A., M. R. McIlvin, D. M. Moran, T. J. Goepfert, G. R. DiTullio, A. F. Post and C. H. Lamborg  
1040 (2014). "Multiple nutrient stresses at intersecting Pacific Ocean biomes detected by protein  
1041 biomarkers." Science **345**(6201): 1173-1177.
- 1042 Sher, D., J. W. Thompson, N. Kashtan, L. Croal and S. W. Chisholm (2011). "Response of *Prochlorococcus*  
1043 ecotypes to co-culture with diverse marine bacteria." Isme J **5**(7): 1125-1132.
- 1044 Van Mooy, B. A., G. Rocoap, H. F. Fredricks, C. T. Evans and A. H. Devol (2006). "Sulfolipids dramatically  
1045 decrease phosphorus demand by picocyanobacteria in oligotrophic marine environments." Proc Natl  
1046 Acad Sci U S A **103**(23): 8607-8612.
- 1047 Vaultot, D., D. Marie, R. J. Olson and S. W. Chisholm (1995). "Growth of *prochlorococcus*, a  
1048 photosynthetic prokaryote, in the equatorial pacific ocean." Science **268**(5216): 1480-1482.

- 1049 Zubkov, M. V., G. A. Tarran and B. M. Fuchs (2004). "Depth related amino acid uptake by  
1050 *Prochlorococcus* cyanobacteria in the Southern Atlantic tropical gyre." *Fems Microbiology Ecology* **50**(3):  
1051 153-161.
- 1052 Moore, L. R., G. Rocap and S. W. Chisholm (1998). "Physiology and molecular phylogeny of coexisting  
1053 *Prochlorococcus* ecotypes." *Nature* **393**(6684): 464-467.
- 1054 Morris, J. J., R. E. Lenski and E. R. Zinser (2012). "The Black Queen Hypothesis: Evolution of  
1055 Dependencies through Adaptive Gene Loss." *mBio* **3**(2).
- 1056
